# Supplementary material for: Massive comparative genomic analysis reveals convergent evolution of specialized bacteria
Source: Springer Nature journal article supplement (doi:10.1186/1745-6150-4-13), 2009-04-10
Supplement: Additional file 1 [file 1745-6150-4-13-s1.pdf]

| Genome Name                                              | Phylum         | Refseq    | Lifestyle* | Genome Size(Mb) | GC% | Gene Count | CDS  | COG Genes | Operon      |            |              |              |              |              |              | tRNA | ITS_length (Mean) | Genes for Regulation | # Growth time [References] |              |                                      |      |
|----------------------------------------------------------|----------------|-----------|------------|-----------------|-----|------------|------|-----------|-------------|------------|--------------|--------------|--------------|--------------|--------------|------|-------------------|----------------------|----------------------------|--------------|--------------------------------------|------|
|                                                          |                |           |            |                 |     |            |      |           | operon nber | 16s_23s_5s | 16s_1_23s_5s | 16s_2_23s_5s | 16s_3_23s_5s | 16s_5_23s_5s | 16s_4_23s_5s |      |                   |                      |                            | 16s_23s_1_5s | additional <sup>§</sup>              | 5s   |
| <i>Bifidobacterium longum</i> NCC2705                    | Actinobacteria | NC_004307 | FHA        | 2,26            | 60  | 1799       | 1729 | 1336      | 4           | 4          |              |              |              |              |              |      |                   | 57                   | 423                        | 89           | 24 - 48h                             | [1]  |
| <i>Corynebacterium diphtheriae</i> NCTC 13129            | Actinobacteria | NC_002935 | FL         | 2,49            | 53  | 2349       | 2272 | 1576      | 5           | 5          |              |              |              |              |              |      |                   | 54                   | 460                        | 73           | 24 - 48h                             | [2]  |
| <i>Corynebacterium efficiens</i> YS-314                  | Actinobacteria | NC_004369 | FL         | 3,15            | 63  | 3020       | 2950 | 2042      | 5           | 5          |              |              |              |              |              |      |                   | 55                   | 463                        | 7            | 24 - 48h                             | [2]  |
| <i>Corynebacterium glutamicum</i> ATCC 13032 (Bielefeld) | Actinobacteria | NC_006958 | FL         | 3,28            | 54  | 3147       | 3057 | 2129      | 6           | 6          |              |              |              |              |              |      |                   | 60                   | 390                        | 108          | 24 - 48h                             | [2]  |
| <i>Corynebacterium glutamicum</i> ATCC 13032 (Kitasato)  | Actinobacteria | NC_003450 | FL         | 3,31            | 54  | 3073       | 2993 | 2123      | 5           | 5          |              |              |              |              |              |      |                   | 60                   | 391                        | 107          | 24 - 48h                             | [2]  |
| <i>Corynebacterium jeikeium</i> K411                     | Actinobacteria | NC_007164 | FL         | 2,48            | 61  | 2181       | 2120 | 1559      | 3           | 3          |              |              |              |              |              |      |                   | 50                   | 413                        | 53           | 24 - 48h                             | [2]  |
| <i>Mycobacterium avium paratuberculosis</i> K-10         | Actinobacteria | NC_002944 | FHA        | 4,83            | 69  | 4412       | 4350 | 3188      | 1           | 1          |              |              |              |              |              |      |                   | 46                   | 1030                       | 141          | > 7 days                             | [3]  |
| <i>Mycobacterium bovis</i> AF2122/97                     | Actinobacteria | NC_002945 | FHA        | 4,35            | 66  | 3983       | 3920 | 2760      | 1           | 1          |              |              |              |              |              |      |                   | 45                   | 276                        | 114          | > 7 days                             |      |
| <i>Mycobacterium leprae</i> TN                           | Actinobacteria | NC_002677 | P          | 3,27            | 58  | 1663       | 1605 | 1175      | 1           | 1          |              |              |              |              |              |      |                   | 45                   | 1048                       | 40           | > 7 days                             |      |
| <i>Mycobacterium tuberculosis</i> CDC1551                | Actinobacteria | NC_002755 | FHA        | 4,40            | 66  | 4237       | 4189 | 2716      | 1           | 1          |              |              |              |              |              |      |                   | 45                   | 277                        | 116          | > 7 days                             |      |
| <i>Mycobacterium tuberculosis</i> H37Rv                  | Actinobacteria | NC_000962 | FHA        | 4,41            | 66  | 4052       | 3989 | 2807      | 1           | 1          |              |              |              |              |              |      |                   | 45                   | 276                        | 114          | > 7 days                             |      |
| <i>Nocardia farcinica</i> IFM 10152                      | Actinobacteria | NC_006361 | FL         | 6,29            | 71  | 6000       | 5936 | 3814      | 3           | 3          |              |              |              |              |              |      |                   | 53                   | 307                        | 237          | 3 days                               | [4]  |
| <i>Propionibacterium acnes</i> KPA171202                 | Actinobacteria | NC_006085 | FL         | 2,56            | 60  | 2351       | 2297 | 1689      | 3           | 3          |              |              |              |              |              |      |                   | 45                   | 385                        | 80           | 48h                                  | [2]  |
| <i>Rhodococcus sp.</i> RHA1                              | Actinobacteria | NC_008268 | FL         | 9,70            | 67  | 9210       | 9145 | 6069      | 4           | 4          |              |              |              |              |              |      |                   | 50                   | 351                        | 399          | 48h                                  | [2]  |
| <i>Streptomyces avermitilis</i> MA-4680                  | Actinobacteria | NC_003155 | FL         | 9,12            | 71  | 7761       | 7673 | 5044      | 6           | 6          |              |              |              |              | 1            |      |                   | 68                   | 307                        | 408          | 48 - 72h                             | [5]  |
| <i>Streptomyces coelicolor</i> A3(2)                     | Actinobacteria | NC_003888 | FL         | 9,05            | 72  | 8263       | 8154 | 5261      | 6           | 6          |              |              |              |              |              |      |                   | 66                   | 197                        | 455          | 2 - 5 days                           | [6]  |
| <i>Symbiobacterium thermophilum</i> IAM 14863            | Acidobacteria  | NC_006177 | FL         | 3,57            | 69  | 3476       | 3337 | 2464      | 6           | 6          |              |              |              |              |              |      |                   | 99                   | 217                        | 98           | 24h                                  | [7]  |
| <i>Thermobifida fusca</i> YX                             | Actinobacteria | NC_007333 | FL         | 3,64            | 68  | 3184       | 3117 | 2239      | 4           | 4          |              |              |              |              |              |      |                   | 52                   | 523                        | 130          |                                      |      |
| <i>Tropheryma whipplei</i> TW08/27                       | Actinobacteria | NC_004551 | FHA        | 0,93            | 46  | 840        | 783  | 620       | 1           | 1          |              |              |              |              |              |      |                   | 52                   | 294                        | 13           | > 7 days                             | [8]  |
| <i>Tropheryma whipplei</i> Twist                         | Actinobacteria | NC_004572 | FHA        | 0,93            | 46  | 864        | 808  | 624       | 1           | 1          |              |              |              |              |              |      |                   | 53                   | 296                        | 13           | > 7 days                             | [8]  |
| <i>Aquifex aeolicus</i> VF5                              | Aquificae      | NC_000918 | FL         | 1,59            | 43  | 1613       | 1560 | 1346      | 2           |            | 2            |              |              |              |              |      |                   | 44                   | 315                        | 24           | 3 - 5 days                           | [9]  |
| <i>Bacteroides fragilis</i> NCTC 9343                    | Bacteroidetes  | NC_003228 | FHA        | 5,24            | 43  | 4323       | 4231 | 2543      | 6           |            | 6            |              |              | 1            |              |      |                   | 73                   | 478                        | 43           | 24 - 48h                             | [2]  |
| <i>Bacteroides fragilis</i> YCH46                        | Bacteroidetes  | NC_006347 | FHA        | 5,31            | 43  | 4717       | 4625 | 2600      | 6           |            | 6            |              |              |              |              |      |                   | 74                   | 481                        | 44           | 24 - 48h                             | [2]  |
| <i>Bacteroides thetaiotaomicron</i> VPI-5482             | Bacteroidetes  | NC_004663 | FHA        | 6,29            | 43  | 4917       | 4816 | 2900      | 5           |            | 5            |              |              |              |              |      |                   | 71                   | 590                        | 56           | 24 - 48h                             | [2]  |
| <i>Porphyromonas gingivalis</i> W83                      | Bacteroidetes  | NC_002950 | FL         | 2,34            | 48  | 1984       | 1909 | 1223      | 4           |            | 4            |              |              |              |              |      |                   | 53                   | 835                        | 20           | 4 - 7 days                           | [2]  |
| <i>Salinibacter ruber</i> DSM 13855                      | Bacteroidetes  | NC_007677 | FL         | 3,59            | 66  | 2881       | 2833 | 2030      | 1           |            | 1            |              |              |              |              |      |                   | 44                   | 569                        | 59           | DT 14 - 18h                          | [10] |
| <i>Candidatus Protochlamydia amoebophila</i> UWE25       | Chlamydiae     | NC_005861 | P          | 2,41            | 35  | 2075       | 2031 | 1127      | 3           | 3          |              |              |              |              |              |      |                   | 35                   | 1                          | 20           |                                      |      |
| <i>Chlamydia muridarum</i> Nigg                          | Chlamydiae     | NC_002620 | P          | 1,08            | 40  | 957        | 911  | 629       | 2           | 2          |              |              |              |              |              |      |                   | 37                   | 242                        | 7            | cell cycle 18h<br>cell lysis 40-48 h | [11] |
| <i>Chlamydia trachomatis</i> A/HAR-13                    | Chlamydiae     | NC_007429 | P          | 1,05            | 41  | 961        | 919  | 640       | 2           | 2          |              |              |              |              |              |      |                   | 37                   | 316                        | 8            | 72h                                  | [12] |
| <i>Chlamydia trachomatis</i> D/UW-3/CX                   | Chlamydiae     | NC_000117 | P          | 1,04            | 41  | 941        | 895  | 634       | 2           | 2          |              |              |              |              |              |      |                   | 37                   | 316                        | 8            | 72 h                                 | [12] |
| <i>Chlamydomonas abortus</i> S26/3                       | Chlamydiae     | NC_004552 | P          | 1,14            | 40  | 974        | 932  | 649       | 1           | 1          |              |              |              |              |              |      |                   | 38                   | 310                        | 7            | 72h                                  | [13] |

| Genome Name                                      | Phylum        | Refseq    | Lifestyle* | Genome Size(Mb) | GC% | Gene Count | CDS  | COG Genes |             |            |              |              |              |              |              | tRNA | ITS_ length (Mean) | Genes for Regulation | # Growth time<br>[References] |                            |                         |      |
|--------------------------------------------------|---------------|-----------|------------|-----------------|-----|------------|------|-----------|-------------|------------|--------------|--------------|--------------|--------------|--------------|------|--------------------|----------------------|-------------------------------|----------------------------|-------------------------|------|
|                                                  |               |           |            |                 |     |            |      |           | operon nber | 16s_23s_5s | 16s_1_23s_5s | 16s_2_23s_5s | 16s_3_23s_5s | 16s_5_23s_5s | 16s_4_23s_5s |      |                    |                      |                               | 16s_23s_1_5s               | additional <sup>s</sup> | 5s   |
| <i>Chlamydomophila caviae</i> GPIC               | Chlamydiae    | NC_003361 | P          | 1,18            | 39  | 1049       | 1005 | 658       | 1           | 1          |              |              |              |              |              |      | 38                 | 311                  | 9                             | 3 - 5 days                 |                         |      |
| <i>Chlamydomophila felis</i> Fe/C-56             | Chlamydiae    | NC_007899 | P          | 1,17            | 39  | 1054       | 1013 | 676       | 1           | 1          |              |              |              |              |              |      | 38                 | 225                  | 95                            | 72h                        | [14]                    |      |
| <i>Chlamydomophila pneumoniae</i> AR39           | Chlamydiae    | NC_002179 | P          | 1,23            | 41  | 1156       | 1112 | 665       | 1           | 1          |              |              |              |              |              |      | 38                 | 308                  | 8                             | 3 - 7 days                 | [15]                    |      |
| <i>Chlamydomophila pneumoniae</i> CWL029         | Chlamydiae    | NC_000922 | P          | 1,23            | 41  | 1096       | 1052 | 669       | 1           | 1          |              |              |              |              |              |      | 38                 | 300                  | 8                             | 3 - 7 days                 | [15]                    |      |
| <i>Chlamydomophila pneumoniae</i> J138           | Chlamydiae    | NC_002491 | P          | 1,23            | 41  | 1107       | 1069 | 671       | 1           | 1          |              |              |              |              |              |      | 38                 | 308                  | 8                             | 3 - 7 days                 | [15]                    |      |
| <i>Chlamydomophila pneumoniae</i> TW-183         | Chlamydiae    | NC_005043 | P          | 1,23            | 41  | 1157       | 1113 | 670       | 1           | 1          |              |              |              |              |              |      | 38                 | 300                  | 8                             | 3 - 7 days                 | [15]                    |      |
| <i>Chlorobium chlorochromatii</i> CaD3           | Chlorobi      | NC_007514 | FL         | 2,57            | 44  | 2047       | 2002 | 1452      | 1           | 1          |              |              |              |              |              |      | 45                 | 457                  | 28                            |                            |                         |      |
| <i>Chlorobium tepidum</i> TLS                    | Chlorobi      | NC_002932 | FL         | 2,15            | 57  | 2308       | 2252 | 1502      | 2           |            | 2            |              |              |              |              |      | 50                 | 526                  | 25                            | 24 - 48h                   | [16]                    |      |
| <i>Pelodictyon luteolum</i> DSM 273              | Chlorobi      | NC_007512 | FL         | 2,36            | 57  | 2137       | 2083 | 1611      | 2           |            | 2            |              |              |              |              |      | 48                 | 577                  | 38                            |                            |                         |      |
| <i>Dehalococcoides ethenogenes</i> 195           | Chloroflexi   | NC_002936 | FL         | 1,47            | 49  | 1631       | 1580 | 1119      | 0           |            |              |              |              |              | 1            | 1    | 1                  | 46                   |                               | 54                         |                         |      |
| <i>Dehalococcoides</i> sp. CBDB1                 | Chloroflexi   | NC_007356 | FL         | 1,40            | 47  | 1510       | 1458 | 1091      | 0           |            |              |              |              |              | 1            | 1    | 1                  | 47                   |                               | 59                         | > 7 days                | [17] |
| <i>Anabaena variabilis</i> ATCC 29413            | Cyanobacteria | NC_007413 | FL         | 7,07            | 41  | 5763       | 5701 | 3688      | 4           | 1          | 3            |              |              |              |              |      | 47                 | 502                  | 99                            | 24 - 48h                   | [18]                    |      |
| <i>Gloeobacter violaceus</i> PCC 7421            | Cyanobacteria | NC_005125 | FL         | 4,66            | 62  | 4482       | 4430 | 2869      | 1           | 1          |              |              |              |              |              |      | 45                 | 459                  | 106                           | 3 - 5 days                 | [19]                    |      |
| <i>Nostoc</i> sp. PCC 7120                       | Cyanobacteria | NC_003272 | FL         | 7,21            | 41  | 6213       | 6130 | 3802      | 4           | 1          | 3            |              |              |              |              |      | 48                 | 287                  | 104                           | 48h                        | [20]                    |      |
| <i>Prochlorococcus marinus marinus</i> CCMP1375  | Cyanobacteria | NC_005042 | FL         | 1,75            | 36  | 1932       | 1883 | 1167      | 2           |            | 2            |              |              |              |              |      | 44                 | 830                  | 16                            | DT 6h + circadian<br>rythm | [21,22]                 |      |
| <i>Prochlorococcus marinus</i> MIT 9312          | Cyanobacteria | NC_007577 | FL         | 1,71            | 31  | 1856       | 1811 | 1182      | 1           |            | 1            |              |              |              |              |      | 39                 | 541                  | 16                            | DT 6h + circadian<br>rythm |                         |      |
| <i>Prochlorococcus marinus</i> MIT 9313          | Cyanobacteria | NC_005071 | FL         | 2,41            | 51  | 2333       | 2275 | 1440      | 1           |            | 1            |              |              |              |              |      | 38                 | 690                  | 23                            | DT 6h + circadian<br>rythm |                         |      |
| <i>Prochlorococcus marinus</i> NATL2A            | Cyanobacteria | NC_007335 | FL         | 1,84            | 35  | 1940       | 1896 | 1175      | 1           |            | 1            |              |              |              |              |      | 40                 | 667                  | 15                            | DT 6h + circadian<br>rythm |                         |      |
| <i>Prochlorococcus marinus pastoris</i> CCMP1986 | Cyanobacteria | NC_005072 | FL         | 1,66            | 31  | 1765       | 1719 | 1174      | 1           |            | 1            |              |              |              |              |      | 37                 | 549                  | 14                            | DT 6h + circadian<br>rythm |                         |      |
| <i>Synechococcus elongatus</i> PCC 6301          | Cyanobacteria | NC_006576 | FL         | 2,70            | 55  | 2582       | 2527 | 1833      | 2           |            | 2            |              |              |              |              |      | 45                 | 546                  | 36                            | 24h                        | [23]                    |      |
| <i>Synechococcus elongatus</i> PCC 7942          | Cyanobacteria | NC_007604 | FL         | 2,74            | 55  | 2715       | 2662 | 1869      | 2           | 2          |              |              |              |              |              |      | 44                 | 546                  | 40                            | 24h                        | [24]                    |      |
| <i>Synechococcus</i> sp. CC9311                  | Cyanobacteria | NC_008319 | FL         | 2,61            | 52  | 2944       | 2892 | 1612      | 2           |            | 2            |              |              |              |              |      | 44                 | 763                  | 24                            | 24h                        | [25]                    |      |
| <i>Synechococcus</i> sp. CC9605                  | Cyanobacteria | NC_007516 | FL         | 2,51            | 59  | 2756       | 2702 | 1556      | 2           |            | 2            |              |              |              |              |      | 45                 | 796                  | 22                            | 24h                        |                         |      |
| <i>Synechococcus</i> sp. CC9902                  | Cyanobacteria | NC_007513 | FL         | 2,23            | 54  | 2358       | 2307 | 1459      | 2           | 2          |              |              |              |              |              |      | 45                 | 778                  | 18                            | 24h                        |                         |      |
| <i>Synechococcus</i> sp. JA-2-3Ba(2-13)          | Cyanobacteria | NC_007776 | FL         | 3,05            | 58  | 2914       | 2862 | 1968      | 2           |            | 2            |              |              |              |              |      | 45                 | 729                  | 41                            | 24h                        |                         |      |
| <i>Synechococcus</i> sp. JA-3-3Ab                | Cyanobacteria | NC_007775 | FL         | 2,93            | 60  | 2815       | 2760 | 1874      | 2           |            | 2            |              |              |              |              |      | 47                 | 556                  | 42                            | 24h                        |                         |      |
| <i>Synechococcus</i> sp. WH 8102                 | Cyanobacteria | NC_005070 | FL         | 2,43            | 59  | 2586       | 2528 | 1560      | 2           |            | 2            |              |              |              |              |      | 44                 | 808                  | 26                            | DT 15 - 23h                | [26]                    |      |
| <i>Synechocystis</i> sp. PCC 6803                | Cyanobacteria | NC_000911 | FL         | 3,95            | 47  | 3619       | 3569 | 2473      | 2           |            | 2            |              |              |              |              |      | 43                 | 466                  | 50                            | 1 - 3 days                 | [27]                    |      |
| <i>Thermosynechococcus elongatus</i> BP-1        | Cyanobacteria | NC_004113 | FL         | 2,59            | 54  | 2525       | 2476 | 1765      | 1           |            | 1            |              |              |              |              |      | 42                 | 421                  | 31                            | DT 20 h                    | [28]                    |      |
| <i>Deinococcus radiodurans</i> R1                | Deinococcus-  | NC_001263 | FL         | 3,28            | 67  | 3248       | 3181 | 2292      | 3           | 1          | 2            |              |              |              |              |      | 49                 |                      | 91                            | 24 - 48h                   | [2]                     |      |
| <i>Thermus thermophilus</i> HB27                 | Thermus       | NC_005835 | FL         | 2,13            | 69  | 2272       | 2210 | 1742      | 0           |            |              |              |              |              | 2            | 2    | 2                  | 47                   |                               | 46                         | 24 - 48 h               | [29] |

| Genome Name                                              | Phylum     | Refseq    | Lifestyle* | Genome Size(Mb) | GC% | Gene Count | CDS  | COG Genes | operon nber | 16s_23s_5s | 16s_1_23s_5s | 16s_2_23s_5s | 16s_3_23s_5s | 16s_5_23s_5s | 16s_4_23s_5s | 16s_23s_1_5s | additional <sup>s</sup> |     |     | tRNA | ITS_ length (Mean) | Genes for Regulation | # Growth time | [References] |      |
|----------------------------------------------------------|------------|-----------|------------|-----------------|-----|------------|------|-----------|-------------|------------|--------------|--------------|--------------|--------------|--------------|--------------|-------------------------|-----|-----|------|--------------------|----------------------|---------------|--------------|------|
|                                                          |            |           |            |                 |     |            |      |           |             |            |              |              |              |              |              |              | 5s                      | 23s | 16s |      |                    |                      |               |              |      |
| <i>Thermus thermophilus</i> HB8                          | Thermus    | NC_006461 | FL         | 2,12            | 69  | 2291       | 2238 | 1748      | 0           |            |              |              |              |              |              |              |                         | 2   | 2   | 2    | 47                 | 49                   | 24 - 48 h     | [30]         |      |
| <i>Aster yellows witches-broom phytoplasma</i> AYWB      | Firmicutes | NC_007716 | M          | 0,72            | 27  | 728        | 693  | 393       | 2           | 2          |              |              |              |              |              |              |                         |     |     |      | 31                 | 246                  | 1             | > 7 days     | [31] |
| <i>Bacillus anthracis</i> Ames                           | Firmicutes | NC_003997 | FL         | 5,23            | 35  | 5536       | 5311 | 3430      | 11          | 9          | 2            |              |              |              |              |              |                         |     |     |      | 95                 | 171                  | 246           | 24 - 48h     | [2]  |
| <i>Bacillus anthracis</i> Ames Ancestor                  | Firmicutes | NC_007530 | FL         | 5,50            | 35  | 5745       | 5617 | 3488      | 11          | 9          | 2            |              |              |              |              |              |                         |     |     |      | 95                 | 179                  | 249           | 24 - 48h     | [2]  |
| <i>Bacillus anthracis</i> Sterne                         | Firmicutes | NC_005945 | FL         | 5,23            | 35  | 5415       | 5287 | 3639      | 11          | 9          | 2            |              |              |              |              |              |                         |     |     |      | 95                 | 169                  | 250           | 24 - 48h     | [2]  |
| <i>Bacillus cereus</i> ATCC 10987                        | Firmicutes | NC_003909 | FL         | 5,43            | 35  | 6080       | 5844 | 3675      | 12          | 10         | 2            |              |              |              |              |              |                         |     |     |      | 98                 | 137                  | 270           | 24 - 48h     | [2]  |
| <i>Bacillus cereus</i> ATCC 14579                        | Firmicutes | NC_004722 | FL         | 5,43            | 35  | 5502       | 5255 | 3510      | 13          | 11         | 2            |              |              |              |              |              |                         |     |     |      | 108                | 182                  | 244           | 24 - 48h     | [2]  |
| <i>Bacillus cereus</i> E33L                              | Firmicutes | NC_006274 | FL         | 5,84            | 35  | 5776       | 5641 | 3815      | 13          | 11         | 2            |              |              |              |              |              |                         |     |     |      | 96                 | 175                  | 285           | 24 - 48h     | [2]  |
| <i>Bacillus clausii</i> KSM-K16                          | Firmicutes | NC_006582 | FL         | 4,30            | 45  | 4192       | 4096 | 3172      | 7           | 6          | 1            |              |              |              |              |              |                         | 1   |     |      | 74                 | 228                  |               | 24 - 48h     | [2]  |
| <i>Bacillus halodurans</i> C-125                         | Firmicutes | NC_002570 | FL         | 4,20            | 44  | 4171       | 4066 | 3088      | 8           | 6          | 2            |              |              |              |              |              |                         | 1   |     |      | 78                 | 683                  | 190           | 24 - 48h     | [2]  |
| <i>Bacillus licheniformis</i> ATCC 14580 (Goettingen)    | Firmicutes | NC_006270 | FL         | 4,22            | 46  | 4289       | 4196 | 3130      | 7           | 5          | 2            |              |              |              |              |              |                         |     |     |      | 72                 | 170                  | 206           | 24 - 48h     | [2]  |
| <i>Bacillus licheniformis</i> ATCC 14580 (Novozymes)     | Firmicutes | NC_006322 | FL         | 4,22            | 46  | 4245       | 4152 | 3091      | 7           | 5          | 2            |              |              |              |              |              |                         |     |     |      | 72                 | 170                  | 209           | 24 - 48h     | [2]  |
| <i>Bacillus subtilis</i> 168                             | Firmicutes | NC_000964 | FL         | 4,21            | 44  | 4291       | 4105 | 3048      | 10          | 8          | 2            |              |              |              |              |              |                         |     |     |      | 86                 | 166                  | 199           | 24 - 48h     | [2]  |
| <i>Bacillus thuringiensis</i> sv konkukian 97-27         | Firmicutes | NC_005957 | FL         | 5,31            | 35  | 5341       | 5197 | 3608      | 13          | 11         | 2            |              |              |              |              |              |                         | 2   | 2   | 2    | 105                | 175                  | 244           | 24 - 48h     | [2]  |
| <i>Carboxydotherrmus hydrogenoformans</i> Z-2901         | Firmicutes | NC_007503 | FL         | 2,40            | 42  | 2683       | 2620 | 1898      | 4           | 3          | 1            |              |              |              |              |              |                         |     |     |      | 50                 | 341                  | 64            | 24 - 48h     | [32] |
| <i>Clostridium acetobutylicum</i> ATCC 824               | Firmicutes | NC_003030 | FL         | 4,13            | 31  | 4017       | 3848 | 2808      | 11          | 11         |              |              |              |              |              |              |                         |     |     |      | 73                 | 178                  | 196           | 24 - 48h     | [2]  |
| <i>Clostridium perfringens</i> ATCC 13124                | Firmicutes | NC_008261 | FL         | 3,26            | 28  | 2993       | 2876 | 2068      | 8           | 6          | 2            |              |              |              |              |              |                         |     |     |      | 93                 | 186                  | 99            | 24 - 48h     | [2]  |
| <i>Clostridium perfringens</i> SM101                     | Firmicutes | NC_008262 | FL         | 2,96            | 28  | 2726       | 2631 | 1922      | 10          | 8          | 2            |              |              |              |              |              |                         | 1   |     |      | 94                 | 415                  | 94            | 24 - 48h     | [2]  |
| <i>Clostridium perfringens</i> str. 13                   | Firmicutes | NC_003366 | FL         | 3,09            | 29  | 2848       | 2723 | 2022      | 10          | 9          | 1            |              |              |              |              |              |                         |     |     |      | 96                 | 189                  | 96            | 24 - 48h     | [2]  |
| <i>Clostridium tetani</i> E88                            | Firmicutes | NC_004557 | FL         | 2,87            | 29  | 2558       | 2432 | 1853      | 6           | 3          | 2            | 1            |              |              |              |              |                         |     |     |      | 54                 | 265                  | 84            | 24 - 48h     | [2]  |
| <i>Desulfitobacterium hafniense</i> Y51                  | Firmicutes | NC_007907 | FL         | 5,73            | 47  | 5137       | 5060 | 3856      | 6           | 2          | 3            | 1            |              |              |              |              |                         |     |     |      | 59                 | 536                  | 242           | 24 - 48h     | [33] |
| <i>Desulfotomaculum reducens</i> MI-1                    | Firmicutes | NC_007519 | FL         | 3,61            | 42  | 3424       | 3324 | 2409      | 4           |            | 4            |              |              |              |              |              |                         |     |     |      | 71                 | 461                  | 69            |              |      |
| <i>Enterococcus faecalis</i> V583                        | Firmicutes | NC_004668 | FL         | 3,36            | 37  | 3384       | 3265 | 2210      | 4           | 2          | 2            |              |              |              |              |              |                         |     |     |      | 68                 | 259                  | 113           | 24 - 48h     | [2]  |
| <i>Geobacillus kaustophilus</i> HTA426                   | Firmicutes | NC_006510 | FL         | 3,59            | 52  | 3654       | 3540 | 2594      | 9           | 7          | 2            |              |              |              |              |              |                         |     |     |      | 87                 | 341                  | 117           | 24 - 48h     | [34] |
| <i>Lactobacillus acidophilus</i> NCFM                    | Firmicutes | NC_006814 | FHA        | 1,99            | 35  | 1938       | 1864 | 1433      | 3           | 2          | 1            |              |              |              |              |              |                         | 1   | 2   | 1    | 61                 | 133                  | 61            | 24 - 48h     | [2]  |
| <i>Lactobacillus brevis</i> ATCC 367                     | Firmicutes | NC_008497 | FL         | 2,34            | 46  | 2300       | 2218 | 1678      | 5           | 3          | 2            |              |              |              |              |              |                         | 1   |     |      | 65                 | 419                  | 115           | 2 - 4 days   | [35] |
| <i>Lactobacillus casei</i> ATCC 334                      | Firmicutes | NC_008526 | FL         | 2,92            | 47  | 2847       | 2771 | 1959      | 5           | 3          | 2            |              |              |              |              |              |                         | 1   |     |      | 59                 | 829                  | 111           | 24 - 48h     | [2]  |
| <i>Lactobacillus delbrueckii bulgaricus</i> ATCC 11842   | Firmicutes | NC_008054 | FL         | 1,86            | 50  | 1684       | 1562 | 1153      | 9           | 5          | 4            |              |              |              |              |              |                         |     |     |      | 95                 | 466                  | 40            | 24 - 48h     | [2]  |
| <i>Lactobacillus delbrueckii bulgaricus</i> ATCC BAA-365 | Firmicutes | NC_008529 | FL         | 1,86            | 50  | 1848       | 1721 | 1196      | 9           | 4          | 5            |              |              |              |              |              |                         | 1   |     |      | 98                 | 566                  | 48            | 24 - 48h     | [2]  |
| <i>Lactobacillus gasseri</i> ATCC 33323                  | Firmicutes | NC_008530 | FL         | 1,89            | 35  | 1853       | 1755 | 1316      | 6           | 4          | 2            |              |              |              |              |              |                         | 1   |     |      | 78                 | 553                  | 57            | 24 - 48h     | [2]  |
| <i>Lactobacillus johnsonii</i> NCC 533                   | Firmicutes | NC_005362 | FHA        | 1,99            | 35  | 1936       | 1821 | 1403      | 6           | 4          | 2            |              |              |              |              |              |                         |     |     |      | 79                 | 100                  | 57            | 24 - 48h     | [2]  |

| Genome Name                                               | Phylum     | Refseq    | Lifestyle* | Genome Size(Mb) | GC% | Gene Count | CDS  | COG Genes | operon nber | 16s        |              |              |              |              |              |              | tRNA | ITS_ length (Mean) | Genes for Regulation | # Growth time | [References] |                         |      |
|-----------------------------------------------------------|------------|-----------|------------|-----------------|-----|------------|------|-----------|-------------|------------|--------------|--------------|--------------|--------------|--------------|--------------|------|--------------------|----------------------|---------------|--------------|-------------------------|------|
|                                                           |            |           |            |                 |     |            |      |           |             | 16s_23s_5s | 16s_1_23s_5s | 16s_2_23s_5s | 16s_3_23s_5s | 16s_5_23s_5s | 16s_4_23s_5s | 16s_23s_1_5s |      |                    |                      |               |              | additional <sup>s</sup> | 5s   |
| <i>Lactobacillus plantarum</i> WCFS1                      | Firmicutes | NC_004567 | FHA        | 3,35            | 44  | 3182       | 3059 | 2305      | 5           | 3          | 2            |              |              |              |              |              | 1    | 70                 | 206                  | 146           | 24 - 48h     | [2]                     |      |
| <i>Lactobacillus sakei</i> sakei 23K                      | Firmicutes | NC_007576 | FHA        | 1,88            | 41  | 1963       | 1879 | 1462      | 7           | 6          | 1            |              |              |              |              |              |      | 63                 | 434                  | 82            | 24 - 48h     | [2]                     |      |
| <i>Lactobacillus salivarius</i> salivarius UCC118         | Firmicutes | NC_007929 | FHA        | 2,13            | 33  | 2116       | 2017 | 1476      | 7           | 5          | 2            |              |              |              |              |              |      | 78                 | 409                  | 67            | 24 - 48h     | [2]                     |      |
| <i>Lactococcus lactis</i> lactis II1403                   | Firmicutes | NC_002662 | FHA        | 2,37            | 35  | 2424       | 2321 | 1756      | 6           |            | 6            |              |              |              |              |              | 1    | 61                 | 305                  | 81            | 3 days       | [36]                    |      |
| <i>Leuconostoc mesenteroides</i> mesenteroides ATCC 8293  | Firmicutes | NC_008531 | FL         | 2,08            | 38  | 2090       | 2005 | 1547      | 4           |            | 4            |              |              |              |              |              |      | 71                 | 376                  | 69            | 24 - 48h     | [2]                     |      |
| <i>Listeria innocua</i> Clip11262                         | Firmicutes | NC_003212 | FL         | 3,09            | 37  | 3172       | 3043 | 2391      | 6           | 4          | 2            |              |              |              |              |              |      | 66                 | 246                  | 144           | 24 - 48h     | [2]                     |      |
| <i>Listeria monocytogenes</i> 4b F2365                    | Firmicutes | NC_002973 | FL         | 2,91            | 38  | 2964       | 2821 | 2266      | 6           | 4          | 2            |              |              |              |              |              |      | 67                 | 245                  | 140           | 24 - 48h     | [2]                     |      |
| <i>Listeria monocytogenes</i> EGD-e                       | Firmicutes | NC_003210 | FL         | 2,94            | 38  | 2976       | 2846 | 2335      | 6           | 4          | 2            |              |              |              |              | 1            |      | 68                 | 245                  | 149           | 24 - 48h     | [2]                     |      |
| <i>Mesoplasma florum</i> L1                               | Firmicutes | NC_006055 | FHA        | 0,79            | 27  | 717        | 682  | 510       | 2           | 2          |              |              |              |              |              |              |      | 29                 | 208                  | 12            |              |                         |      |
| <i>Moorella thermoacetica</i> ATCC 39073                  | Firmicutes | NC_007644 | FL         | 2,63            | 56  | 2615       | 2523 | 2008      | 1           |            | 1            |              |              |              |              | 1            |      | 51                 | 414                  | 92            |              |                         |      |
| <i>Mycoplasma capricolum</i> capricolum ATCC 27343        | Firmicutes | NC_007633 | FHA        | 1,01            | 24  | 854        | 812  | 535       | 2           | 2          |              |              |              |              |              | 1            |      | 30                 | 232                  | 8             | 5 - 7 days   |                         |      |
| <i>Mycoplasma gallisepticum</i> R                         | Firmicutes | NC_004829 | FHA        | 1,00            | 31  | 769        | 726  | 468       | 0           |            |              |              |              |              |              | 2            | 2    | 2                  | 33                   | 661           | 3            | 3 - 5 days              |      |
| <i>Mycoplasma genitalium</i> G37                          | Firmicutes | NC_000908 | FHA        | 0,58            | 32  | 520        | 477  | 387       | 1           | 1          |              |              |              |              |              |              |      | 36                 | 203                  | 3             | GT 24h       | [37]                    |      |
| <i>Mycoplasma hyopneumoniae</i> 232                       | Firmicutes | NC_006360 | FHA        | 0,89            | 29  | 727        | 691  | 431       | 0           |            |              |              |              |              |              | 1            | 1    | 1                  | 30                   | 467           | 5            | 3 - 5 days              |      |
| <i>Mycoplasma hyopneumoniae</i> 7448                      | Firmicutes | NC_007332 | FHA        | 0,92            | 28  | 696        | 663  | 437       | 0           |            |              |              |              |              |              | 1            | 1    | 1                  | 30                   | 484           | 5            | 3 - 5 days              |      |
| <i>Mycoplasma hyopneumoniae</i> J                         | Firmicutes | NC_007295 | FHA        | 0,90            | 29  | 698        | 665  | 433       | 0           |            |              |              |              |              |              | 1            | 1    | 1                  | 30                   | 492           | 5            | 3 - 5 days              |      |
| <i>Mycoplasma mobile</i> 163K                             | Firmicutes | NC_006908 | FHA        | 0,78            | 25  | 667        | 633  | 442       | 0           |            |              |              |              |              |              | 1            | 1    | 1                  | 28                   | 303           | 7            | 5 days                  | [38] |
| <i>Mycoplasma mycoides</i> mycoides SC PG1                | Firmicutes | NC_005364 | FHA        | 1,21            | 24  | 1061       | 1016 | 622       | 2           | 2          |              |              |              |              |              |              |      | 30                 | 224                  | 14            | 3 - 5 days   |                         |      |
| <i>Mycoplasma penetrans</i> HF-2                          | Firmicutes | NC_004432 | FHA        | 1,36            | 26  | 1069       | 1037 | 601       | 1           | 1          |              |              |              |              |              |              |      | 29                 | 299                  | 11            | 3 - 7 days   | [39]                    |      |
| <i>Mycoplasma pneumoniae</i> M129                         | Firmicutes | NC_000912 | FHA        | 0,82            | 40  | 733        | 689  | 426       | 1           | 1          |              |              |              |              |              |              |      | 37                 | 233                  | 3             | 3 - 5 days   |                         |      |
| <i>Mycoplasma pulmonis</i> UAB CTIP                       | Firmicutes | NC_002771 | FHA        | 0,96            | 27  | 820        | 782  | 517       | 0           |            |              |              |              |              |              | 2            | 1    | 1                  | 29                   | 285           | 6            |                         |      |
| <i>Mycoplasma synoviae</i> 53                             | Firmicutes | NC_007294 | FHA        | 0,80            | 28  | 713        | 672  | 448       | 0           |            |              |              |              |              |              | 3            | 2    | 2                  | 34                   | 260           | 6            | 3 - 5 days              |      |
| <i>Oceanobacillus iheyensis</i> HTE831                    | Firmicutes | NC_004193 | FL         | 3,63            | 36  | 3592       | 3500 | 2669      | 7           | 6          | 1            |              |              |              |              | 1            |      | 76                 | 234                  | 141           | 24 - 48 h    | [40]                    |      |
| <i>Oenococcus oeni</i> PSU-1                              | Firmicutes | NC_008528 | FL         | 1,78            | 38  | 1742       | 1691 | 1318      | 2           |            | 2            |              |              |              |              |              |      | 43                 | 386                  | 58            | 5 days       | [41]                    |      |
| <i>Onion yellows phytoplasma</i> OY-M                     | Firmicutes | NC_005303 | M          | 0,86            | 28  | 793        | 754  | 477       | 2           |            |              |              |              |              |              |              | 2    | 32                 | 25                   | 1             |              |                         |      |
| <i>Pediococcus pentosaceus</i> ATCC 25745                 | Firmicutes | NC_008525 | FL         | 1,83            | 37  | 1827       | 1755 | 1389      | 5           | 3          | 2            |              |              |              |              |              |      | 55                 | 418                  | 75            |              |                         |      |
| <i>Staphylococcus aureus</i> RF122                        | Firmicutes | NC_007622 | FL         | 2,74            | 33  | 2591       | 2515 | 1903      | 5           | 2          | 2            | 1            |              |              |              | 1            |      | 55                 | 442                  | 82            | 24 - 48h     | [2]                     |      |
| <i>Staphylococcus aureus</i> subsp. <i>aureus</i> COL     | Firmicutes | NC_002951 | FL         | 2,81            | 33  | 2691       | 2618 | 1954      | 6           | 4          | 1            | 1            |              |              |              | 1            |      | 53                 | 303                  | 84            | 24 - 48h     |                         |      |
| <i>Staphylococcus aureus</i> subsp. <i>aureus</i> MRSA252 | Firmicutes | NC_002952 | FL         | 2,90            | 33  | 2757       | 2656 | 2000      | 5           | 3          | 1            | 1            |              |              |              | 1            |      | 60                 | 365                  | 90            | 24 - 48h     |                         |      |
| <i>Staphylococcus aureus</i> subsp. <i>aureus</i> MSSA476 | Firmicutes | NC_002953 | FL         | 2,82            | 33  | 2702       | 2598 | 1957      | 6           | 4          | 1            | 1            |              |              |              | 1            |      | 60                 | 303                  | 82            | 24 - 48h     |                         |      |
| <i>Staphylococcus aureus</i> subsp. <i>aureus</i> Mu50    | Firmicutes | NC_002758 | FL         | 2,90            | 33  | 2808       | 2731 | 2048      | 5           | 3          | 1            | 1            |              |              |              | 1            |      | 60                 | 336                  | 87            | 24 - 48h     |                         |      |

| Genome Name                                                  | Phylum     | Refseq    | Lifestyle* | Genome Size(Mb) | GC% | Gene Count | CDS  | COG Genes |             |            |              |              |              |              |              |              | tRNA | ITS_ length (Mean) | Genes for Regulation | # Growth time<br>[References] |
|--------------------------------------------------------------|------------|-----------|------------|-----------------|-----|------------|------|-----------|-------------|------------|--------------|--------------|--------------|--------------|--------------|--------------|------|--------------------|----------------------|-------------------------------|
|                                                              |            |           |            |                 |     |            |      |           | operon nber | 16s_23s_5s | 16s_1_23s_5s | 16s_2_23s_5s | 16s_3_23s_5s | 16s_5_23s_5s | 16s_4_23s_5s | 16s_23s_1_5s |      |                    |                      |                               |
| <i>Staphylococcus aureus</i> subsp. <i>aureus</i> MW2        | Firmicutes | NC_003923 | FL         | 2,82            | 33  | 2712       | 2632 | 1973      | 6           | 4          | 1            | 1            |              |              |              | 1            | 60   | 304                | 82                   | 24 - 48h                      |
| <i>Staphylococcus aureus</i> subsp. <i>aureus</i> N315       | Firmicutes | NC_002745 | FL         | 2,84            | 33  | 2698       | 2619 | 2036      | 5           | 2          | 1            | 2            |              |              |              | 1            | 62   | 337                | 89                   | 24 - 48h                      |
| <i>Staphylococcus aureus</i> subsp. <i>aureus</i> NCTC 8325  | Firmicutes | NC_007795 | FL         | 2,82            | 33  | 2969       | 2892 | 1987      | 5           | 3          | 1            | 1            |              |              |              | 1            | 61   | 365                | 84                   | 24 - 48h                      |
| <i>Staphylococcus aureus</i> subsp. <i>aureus</i> USA300     | Firmicutes | NC_007793 | FL         | 2,92            | 33  | 2674       | 2604 | 2012      | 5           | 3          | 1            | 1            |              |              |              | 1            | 53   | 365                | 86                   | 24 - 48h                      |
| <i>Staphylococcus epidermidis</i> ATCC 12228                 | Firmicutes | NC_004461 | FL         | 2,56            | 32  | 2600       | 2485 | 1847      | 5           | 3          | 1            | 1            |              |              |              | 1            | 60   | 262                | 73                   | 24 - 48h                      |
| <i>Staphylococcus epidermidis</i> RP62A                      | Firmicutes | NC_002976 | FL         | 2,64            | 32  | 2609       | 2526 | 1870      | 6           | 4          | 1            | 1            |              |              |              | 1            | 61   | 262                | 77                   | 24 - 48h                      |
| <i>Staphylococcus haemolyticus</i> JCSC1435                  | Firmicutes | NC_007168 | FL         | 2,69            | 33  | 2752       | 2676 | 2014      | 5           | 4          | 1            |              |              |              |              | 1            | 59   | 338                | 101                  | 24 - 48h                      |
| <i>Staphylococcus saprophyticus saprophyticus</i> ATCC 15305 | Firmicutes | NC_007350 | FL         | 2,58            | 33  | 2596       | 2514 | 2042      | 6           | 4          | 1            | 1            |              |              |              |              | 61   | 284                | 102                  | 24 - 48h                      |
| <i>Streptococcus agalactiae</i> 2603V/R                      | Firmicutes | NC_004116 | FL         | 2,16            | 36  | 2242       | 2124 | 1592      | 7           |            | 7            |              |              |              |              |              | 80   | 317                | 81                   | 24 - 48 h [2]                 |
| <i>Streptococcus agalactiae</i> A909                         | Firmicutes | NC_007432 | FL         | 2,13            | 36  | 2098       | 1996 | 1590      | 7           |            | 7            |              |              |              |              |              | 80   | 319                | 76                   | 24 - 48h                      |
| <i>Streptococcus agalactiae</i> NEM316                       | Firmicutes | NC_004368 | FL         | 2,21            | 36  | 2214       | 2094 | 1582      | 7           |            | 7            |              |              |              |              |              | 80   | 318                | 78                   | 24 - 48h                      |
| <i>Streptococcus mutans</i> UA159                            | Firmicutes | NC_004350 | FL         | 2,03            | 37  | 2055       | 1960 | 1522      | 5           |            | 5            |              |              |              |              |              | 65   | 389                | 87                   | 24 - 48h                      |
| <i>Streptococcus pneumoniae</i> D39                          | Firmicutes | NC_008533 | FL         | 2,05            | 40  | 1987       | 1914 | 1499      | 4           |            | 4            |              |              |              |              |              | 58   | 324                | 70                   | 24 - 48h                      |
| <i>Streptococcus pneumoniae</i> R6                           | Firmicutes | NC_003098 | FL         | 2,04            | 40  | 2139       | 2043 | 1584      | 4           |            | 4            |              |              |              |              |              | 58   | 271                | 72                   | 24 - 48h                      |
| <i>Streptococcus pneumoniae</i> TIGR4                        | Firmicutes | NC_003028 | FL         | 2,16            | 40  | 2189       | 2094 | 1542      | 4           |            | 4            |              |              |              |              |              | 58   | 336                | 76                   | 24 - 48h                      |
| <i>Streptococcus pyogenes</i> M1 GAS                         | Firmicutes | NC_002737 | FL         | 1,85            | 39  | 1790       | 1697 | 1341      | 7           |            | 7            |              |              |              |              |              | 60   | 459                | 64                   | 24 - 48h                      |
| <i>Streptococcus pyogenes</i> MGAS10270                      | Firmicutes | NC_008022 | FL         | 1,93            | 38  | 2068       | 1987 | 1415      | 6           | 4          | 2            |              |              |              |              |              | 63   | 426                | 64                   | 24 - 48h                      |
| <i>Streptococcus pyogenes</i> MGAS10394                      | Firmicutes | NC_006086 | FL         | 1,90            | 39  | 1971       | 1886 | 1387      | 6           |            | 6            |              |              |              |              |              | 67   | 421                | 62                   | 24 - 48h                      |
| <i>Streptococcus pyogenes</i> MGAS10750                      | Firmicutes | NC_008024 | FL         | 1,94            | 38  | 2060       | 1979 | 1432      | 6           | 4          | 2            |              |              |              |              |              | 63   | 426                | 64                   | 24 - 48h                      |
| <i>Streptococcus pyogenes</i> MGAS2096                       | Firmicutes | NC_008023 | FL         | 1,86            | 39  | 1979       | 1898 | 1413      | 6           | 4          | 2            |              |              |              |              |              | 63   | 426                | 65                   | 24 - 48h                      |
| <i>Streptococcus pyogenes</i> MGAS315                        | Firmicutes | NC_004070 | FL         | 1,90            | 39  | 1967       | 1865 | 1369      | 6           |            | 6            |              |              |              |              |              | 67   | 416                | 62                   | 24 - 48h                      |
| <i>Streptococcus pyogenes</i> MGAS5005                       | Firmicutes | NC_007297 | FL         | 1,84            | 39  | 1950       | 1865 | 1393      | 6           |            | 6            |              |              |              |              |              | 67   | 421                | 63                   | 24 - 48h                      |
| <i>Streptococcus pyogenes</i> MGAS6180                       | Firmicutes | NC_007296 | FL         | 1,90            | 38  | 1977       | 1894 | 1378      | 6           |            | 6            |              |              |              |              |              | 65   | 426                | 64                   | 24 - 48h                      |
| <i>Streptococcus pyogenes</i> MGAS8232                       | Firmicutes | NC_003485 | FL         | 1,90            | 39  | 1947       | 1845 | 1381      | 6           | 5          | 1            |              |              |              |              |              | 66   | 459                | 64                   | 24 - 48h                      |
| <i>Streptococcus pyogenes</i> MGAS9429                       | Firmicutes | NC_008021 | FL         | 1,84            | 39  | 1962       | 1877 | 1356      | 6           |            | 6            |              |              |              |              |              | 67   | 426                | 62                   | 24 - 48h                      |
| <i>Streptococcus pyogenes</i> SSI-1                          | Firmicutes | NC_004606 | FL         | 1,89            | 39  | 1928       | 1861 | 1348      | 5           |            | 5            |              |              |              |              |              | 57   | 422                | 62                   | 24 - 48h                      |
| <i>Streptococcus thermophilus</i> CNRZ1066                   | Firmicutes | NC_006449 | FL         | 1,80            | 39  | 2000       | 1915 | 1465      | 6           |            | 6            |              |              |              |              |              | 67   | 266                | 47                   | 24 - 48h                      |
| <i>Streptococcus thermophilus</i> LMD-9                      | Firmicutes | NC_008500 | FL         | 1,86            | 39  | 1803       | 1716 | 1262      | 6           |            | 6            |              |              |              |              | 1            | 67   | 278                | 43                   | 24 - 48h                      |
| <i>Streptococcus thermophilus</i> LMG 18311                  | Firmicutes | NC_006448 | FL         | 1,80            | 39  | 1974       | 1889 | 1453      | 6           |            | 6            |              |              |              |              |              | 61   | 266                | 45                   | 24 - 48h                      |
| <i>Thermoanaerobacter tengcongensis</i> MB4                  | Firmicutes | NC_003869 | FL         | 2,69            | 38  | 2692       | 2588 | 1947      | 4           | 3          |              | 1            |              |              |              |              | 55   | 148                | 78                   | 48 h [42]                     |
| <i>Ureaplasma parvum</i> sv 3 ATCC 700970                    | Firmicutes | NC_002162 | FHA        | 0,75            | 25  | 655        | 614  | 409       | 2           | 2          |              |              |              |              |              |              | 30   | 348                | 4                    | 24 - 48h [2]                  |

| Genome Name                                         | Phylum                 | Refseq                 | Lifestyle* | Genome Size(Mb) | GC% | Gene Count | CDS  | COG Genes | 16S rRNA    |            |              |              |              |              |              | ITS_length (Mean) | Genes for Regulation | # Growth time<br>[References] |              |                         |          |      |
|-----------------------------------------------------|------------------------|------------------------|------------|-----------------|-----|------------|------|-----------|-------------|------------|--------------|--------------|--------------|--------------|--------------|-------------------|----------------------|-------------------------------|--------------|-------------------------|----------|------|
|                                                     |                        |                        |            |                 |     |            |      |           | operon nber | 16s_23s_5s | 16s_1_23s_5s | 16s_2_23s_5s | 16s_3_23s_5s | 16s_5_23s_5s | 16s_4_23s_5s |                   |                      |                               | 16s_23s_1_5s | additional <sup>§</sup> | 5s       | 23s  |
| <i>Fusobacterium nucleatum nucleatum</i> ATCC 25586 | Fusobacteria           | NC_003454              | FL         | 2,17            | 27  | 2129       | 2067 | 1531      | 5           | 5          |              |              |              |              |              |                   | 47                   | 159                           | 39           | 48 - 72h                | [2]      |      |
| <i>Rhodopirellula baltica</i> SH 1                  | Planctomycetes         | NC_005027              | FL         | 7,15            | 55  | 7413       | 7325 | 3135      | 0           |            |              |              |              |              |              |                   | 79                   |                               | 66           | 5 days                  | [43]     |      |
| <i>Anaplasma marginale</i> St. Maries               | Proteobacteria (alpha) | NC_004842              | P          | 1,20            | 50  | 986        | 949  | 688       | 0           |            |              |              |              |              |              |                   | 37                   |                               | 5            | 1 - 3 weeks             |          |      |
| <i>Anaplasma phagocytophilum</i> HZ                 | Proteobacteria (alpha) | NC_007797              | P          | 1,47            | 42  | 1306       | 1264 | 679       | 0           |            |              |              |              |              |              |                   | 37                   |                               | 4            | 1 - 3 weeks             | [44,45]  |      |
| <i>Bartonella henselae</i> Houston-1                | Proteobacteria (alpha) | NC_005956              | FHA        | 1,93            | 38  | 1541       | 1488 | 1137      | 2           |            |              | 2            |              |              |              |                   | 44                   | 1256                          | 17           | 5 - 7 days              | [46]     |      |
| <i>Bartonella quintana</i> Toulouse                 | Proteobacteria (alpha) | NC_005955              | FHA        | 1,58            | 39  | 1191       | 1142 | 986       | 2           |            |              | 2            |              |              |              |                   | 42                   | 1206                          | 12           | 5 - 7 days              |          |      |
| <i>Brucella abortus</i> bv 1 9-941                  | Proteobacteria (alpha) | NC_006932<br>NC_006933 | FHA        | 3,29            | 57  | 3149       | 3085 | 2389      | 3           |            |              | 3            |              |              |              |                   | 55                   | 790                           | 112          | 3 - 5 days              | [2]      |      |
| <i>Brucella melitensis</i> 16M                      | Proteobacteria (alpha) | NC_003317<br>NC_003318 | FHA        | 3,29            | 57  | 3282       | 3198 | 2615      | 3           | 1          | 1            | 2            |              |              | 1            |                   | 55                   | 791                           | 112          | 3 - 5 days              | [2]      |      |
| <i>Brucella melitensis</i> bv Abortus 2308          | Proteobacteria (alpha) | NC_007618<br>NC_007624 | FHA        | 3,28            | 57  | 3102       | 3034 | 2385      | 3           |            |              | 3            |              |              |              |                   | 60                   | 790                           | 109          | 3 - 5 days              | [2]      |      |
| <i>Brucella suis</i> 1330                           | Proteobacteria (alpha) | NC_004310<br>NC_004311 | FHA        | 3,32            | 57  | 3335       | 3271 | 2475      | 4           | 1          |              | 3            |              |              |              |                   | 55                   | 763                           | 109          | 3 - 5 days              | [2]      |      |
| <i>Candidatus Pelagibacter ubique</i> HTCC1062      | Proteobacteria (alpha) | NC_007205              | FL         | 1,31            | 30  | 1389       | 1354 | 1131      | 1           |            |              | 1            |              |              |              |                   | 32                   | 270                           | 21           |                         |          |      |
| <i>Caulobacter crescentus</i> CB15                  | Proteobacteria (alpha) | NC_002696              | FL         | 4,02            | 67  | 3810       | 3737 | 2886      | 2           |            |              | 2            |              |              |              |                   | 51                   | 690                           | 138          | 24 - 48h                | [47]     |      |
| <i>Ehrlichia canis</i> Jake                         | Proteobacteria (alpha) | NC_007354              | P          | 1,32            | 29  | 984        | 942  | 665       | 0           |            |              |              |              |              | 1            | 1                 | 1                    | 36                            |              | 5                       | > 7 days | [48] |
| <i>Ehrlichia chaffeensis</i> Arkansas               | Proteobacteria (alpha) | NC_007799              | P          | 1,18            | 30  | 1148       | 1105 | 668       | 0           |            |              |              |              |              | 1            | 1                 | 1                    | 37                            |              | 5                       | > 7 days |      |
| <i>Ehrlichia ruminantium</i> Gardel                 | Proteobacteria (alpha) | NC_006831              | P          | 1,50            | 28  | 989        | 950  | 671       | 0           |            |              |              |              |              | 1            | 1                 | 1                    | 36                            |              | 6                       | > 7 days |      |
| <i>Ehrlichia ruminantium</i> Welgevonden (ARC-OVI)  | Proteobacteria (alpha) | NC_006832              | P          | 1,52            | 27  | 929        | 888  | 660       | 0           |            |              |              |              |              | 1            | 1                 | 1                    | 36                            |              | 6                       | > 7 days |      |
| <i>Ehrlichia ruminantium</i> Welgevonden (CIRAD)    | Proteobacteria (alpha) | NC_005295              | P          | 1,51            | 27  | 997        | 958  | 678       | 0           |            |              |              |              |              | 1            | 1                 | 1                    | 36                            |              | 6                       | > 7 days |      |
| <i>Erythrobacter litoralis</i> HTCC2594             | Proteobacteria (alpha) | NC_007722              | FL         | 3,05            | 63  | 3056       | 3011 | 2145      | 1           |            |              | 1            |              |              |              |                   | 44                   | 814                           | 56           | 4 days                  | [49]     |      |
| <i>Gluconobacter oxydans</i> 621H                   | Proteobacteria (alpha) | NC_006677              | FL         | 2,92            | 61  | 2731       | 2664 | 1952      | 4           |            |              | 4            |              |              |              |                   | 50                   | 663                           | 64           | 24 - 48h                | [2]      |      |
| <i>Jannaschia</i> sp. CCS1                          | Proteobacteria (alpha) | NC_007802              | FL         | 4,40            | 62  | 4336       | 4283 | 3175      | 1           |            |              | 1            |              |              |              |                   | 42                   | 780                           | 135          |                         |          |      |
| <i>Magnetospirillum magneticum</i> AMB-1            | Proteobacteria (alpha) | NC_007626              | FL         | 4,97            | 65  | 4563       | 4559 | 3098      | 2           |            |              | 2            |              |              |              |                   | 46                   | 403                           | 111          | 3 - 5 days              | [50]     |      |
| <i>Neorickettsia sennetsu</i> Miyayama              | Proteobacteria (alpha) | NC_007798              | P          | 0,86            | 41  | 970        | 932  | 586       | 0           |            |              |              |              |              | 1            | 1                 | 1                    | 33                            |              | 4                       | > 7 days | [48] |
| <i>Nitrobacter winogradskyi</i> Nb-255              | Proteobacteria (alpha) | NC_007406              | FL         | 3,40            | 62  | 3198       | 3143 | 2294      | 1           |            |              | 1            |              |              |              |                   | 49                   | 823                           | 55           |                         |          |      |
| <i>Novosphingobium aromaticivorans</i> DSM 12444    | Proteobacteria (alpha) | NC_007794              | FL         | 3,56            | 65  | 3412       | 3338 | 2498      | 3           |            |              | 3            |              |              |              |                   | 57                   | 672                           | 98           |                         |          |      |
| <i>Rhodobacter sphaeroides</i> 2.4.1                | Proteobacteria (alpha) | NC_007493              | FL         | 4,60            | 69  | 4369       | 4304 | 3267      | 3           |            |              | 3            |              |              | 1            |                   | 42                   | 666                           | 115          | 3 days                  | [2]      |      |
| <i>Rhodopseudomonas palustris</i> BisB18            | Proteobacteria (alpha) | NC_007925              | FL         | 5,51            | 65  | 5016       | 4943 | 3688      | 2           |            |              | 2            |              |              |              |                   | 50                   | 1090                          | 122          | 3 - 5 days              | [51]     |      |
| <i>Rhodopseudomonas palustris</i> CGA009            | Proteobacteria (alpha) | NC_005296              | FL         | 5,47            | 65  | 4918       | 4838 | 3791      | 2           |            |              | 2            |              |              | 1            |                   | 49                   | 748                           | 118          | 3 - 5 days              |          |      |
| <i>Rhodopseudomonas palustris</i> HaA2              | Proteobacteria (alpha) | NC_007778              | FL         | 5,33            | 66  | 4772       | 4712 | 3637      | 1           |            |              | 1            |              |              |              |                   | 50                   | 816                           | 114          | 3 - 5 days              |          |      |

| Genome Name                                              | Phylum                 | Refseq                              | Lifestyle* | Genome Size(Mb) | GC% | Gene Count | CDS  | COG Genes | operon nber | 16s_23s_5s | 16s_1_23s_5s | 16s_2_23s_5s | 16s_3_23s_5s | 16s_5_23s_5s | 16s_4_23s_5s | 16s_23s_1_5s | additional <sup>§</sup> | 5s | 23s | 16s | tRNA | ITS_length (Mean) | Genes for Regulation | # Growth time | [References] |
|----------------------------------------------------------|------------------------|-------------------------------------|------------|-----------------|-----|------------|------|-----------|-------------|------------|--------------|--------------|--------------|--------------|--------------|--------------|-------------------------|----|-----|-----|------|-------------------|----------------------|---------------|--------------|
|                                                          |                        |                                     |            |                 |     |            |      |           |             |            |              |              |              |              |              |              |                         |    |     |     |      |                   |                      |               |              |
| <i>Rhodospirillum rubrum</i> ATCC 11170                  | Proteobacteria (alpha) | NC_007643                           | FL         | 4,41            | 65  | 3920       | 3850 | 3048      | 4           |            |              | 4            |              |              |              |              |                         | 1  |     |     | 55   | 766               | 115                  | 5 days        |              |
| <i>Rickettsia bellii</i> RML369-C                        | Proteobacteria (alpha) | NC_007940                           | P          | 1,52            | 32  | 1469       | 1429 | 954       | 0           |            |              |              |              |              |              |              |                         | 1  | 1   | 1   | 34   |                   | 10                   | > 7 days      | [52]         |
| <i>Rickettsia conorii</i> Malish 7                       | Proteobacteria (alpha) | NC_003103                           | P          | 1,27            | 32  | 1414       | 1374 | 855       | 0           |            |              |              |              |              |              |              |                         | 1  | 1   | 1   | 33   |                   | 8                    | > 7 days      | [53]         |
| <i>Rickettsia felis</i> URRWXCal2                        | Proteobacteria (alpha) | NC_007109                           | P          | 1,59            | 33  | 1551       | 1512 | 1037      | 0           |            |              |              |              |              |              |              |                         | 1  | 1   | 1   | 33   |                   | 10                   | > 7 days      |              |
| <i>Rickettsia prowazekii</i> Madrid E                    | Proteobacteria (alpha) | NC_000963                           | P          | 1,11            | 29  | 875        | 835  | 713       | 0           |            |              |              |              |              |              |              |                         | 1  | 1   | 1   | 33   |                   | 5                    | > 7 days      |              |
| <i>Rickettsia typhi</i> Wilmington                       | Proteobacteria (alpha) | NC_006142                           | P          | 1,11            | 29  | 877        | 838  | 704       | 0           |            |              |              |              |              |              |              |                         | 1  | 1   | 1   | 33   |                   | 4                    | > 7 days      |              |
| <i>Roseobacter denitrificans</i> OCh 114                 | Proteobacteria (alpha) | NC_008209                           | FL         | 4,33            | 59  | 4171       | 4129 | 3076      | 1           |            |              | 1            |              |              |              |              |                         |    |     |     | 38   | 885               | 113                  | 3 - 4 days    | [54]         |
| <i>Silicibacter pomeroyi</i> DSS-3                       | Proteobacteria (alpha) | NC_003911                           | FL         | 4,60            | 64  | 4316       | 4252 | 3399      | 3           |            |              | 3            |              |              |              |              |                         |    |     |     | 53   | 891               | 173                  | 3 - 5 days    | [55]         |
| <i>Wolbachia endosymbiont of Drosophila melanogaster</i> | Proteobacteria (alpha) | NC_002978                           | M          | 1,27            | 35  | 1239       | 1195 | 753       | 0           |            |              |              |              |              |              |              |                         | 1  | 1   | 1   | 34   |                   | 5                    | > 7 days      | [56]         |
| <i>Wolbachia endosymbiont TRS of Brugia malayi</i>       | Proteobacteria (alpha) | NC_006833                           | M          | 1,08            | 34  | 842        | 805  | 598       | 0           |            |              |              |              |              |              |              |                         | 1  | 1   | 1   | 34   |                   | 2                    | > 7 days      |              |
| <i>Zymomonas mobilis mobilis</i> ZM4                     | Proteobacteria (alpha) | NC_006526                           | FL         | 2,06            | 46  | 2058       | 1998 | 1432      | 3           |            |              | 3            |              |              |              |              |                         |    |     |     | 51   | 607               | 41                   | 3 - 5 days    | [2]          |
| <i>Azoarcus sp.</i> BH72                                 | Proteobacteria (beta)  | NC_006513                           | FL         | 4,38            | 68  | 4054       | 3989 | 3226      | 4           |            |              | 4            |              |              |              |              |                         |    |     |     | 56   | 515               | 88                   |               |              |
| <i>Bordetella bronchiseptica</i> RB50                    | Proteobacteria (beta)  | NC_002927                           | FHA        | 5,34            | 68  | 5070       | 4994 | 4218      | 3           |            |              | 3            |              |              |              |              |                         |    |     |     | 56   | 593               | 192                  | 24 - 48h      | [57]         |
| <i>Bordetella parapertussis</i> 12822                    | Proteobacteria (beta)  | NC_002928                           | FHA        | 4,77            | 68  | 4259       | 4185 | 3654      | 3           |            |              | 3            |              |              |              |              |                         |    |     |     | 54   | 593               | 165                  | 2 - 3 days    |              |
| <i>Bordetella pertussis</i> Tohama I                     | Proteobacteria (beta)  | NC_002929                           | FHA        | 4,09            | 68  | 3505       | 3436 | 2824      | 3           |            |              | 3            |              |              |              |              |                         |    |     |     | 51   | 585               | 123                  | 2 - 3 days    |              |
| <i>Burkholderia mallei</i> ATCC 23344                    | Proteobacteria (beta)  | NC_006348                           | FL         | 5,84            | 68  | 5094       | 5025 | 3686      | 3           |            | 1            | 2            |              |              |              |              |                         |    |     |     | 56   | 624               | 183                  | 24 - 48h      | [58]         |
| <i>Burkholderia pseudomallei</i> 1710b                   | Proteobacteria (beta)  | NC_007434<br>NC_007435              | FL         | 7,31            | 68  | 6420       | 6347 | 4439      | 4           |            |              | 4            |              |              |              |              |                         |    |     |     | 60   | 662               | 210                  | 2 - 5 days    |              |
| <i>Burkholderia pseudomallei</i> K96243                  | Proteobacteria (beta)  | NC_006349<br>NC_006350<br>NC_006351 | FL         | 7,25            | 68  | 5809       | 5728 | 4468      | 4           |            |              | 4            |              |              |              |              |                         |    |     |     | 61   | 634               | 218                  | 2 - 5 days    |              |
| <i>Burkholderia sp.</i> 383                              | Proteobacteria (beta)  | NC_007509<br>NC_007510<br>NC_007511 | FL         | 8,68            | 66  | 7813       | 7725 | 6026      | 6           | 1          |              | 5            |              |              |              |              |                         |    |     |     | 67   | 544               | 398                  | 24 - 48h      |              |
| <i>Burkholderia thailandensis</i> E264                   | Proteobacteria (beta)  | NC_007650<br>NC_007651              | FL         | 6,72            | 68  | 5706       | 5634 | 4409      | 4           |            |              | 4            |              |              |              |              |                         |    |     |     | 58   | 594               | 219                  | 24 - 48h      | [59]         |
| <i>Burkholderia xenovorans</i> LB400                     | Proteobacteria (beta)  | NC_007951<br>NC_007952              | FL         | 9,73            | 63  | 9037       | 8951 | 6696      | 6           |            |              | 6            |              |              |              |              |                         |    |     |     | 65   | 601               | 391                  | 24 - 48h      |              |
| <i>Chromobacterium violaceum</i> ATCC 12472              | Proteobacteria (beta)  | NC_005085                           | FL         | 4,75            | 65  | 4547       | 4407 | 3316      | 8           |            |              | 8            |              |              |              |              |                         | 1  |     |     | 98   | 508               | 136                  | 24 - 48h      | [2]          |
| <i>Dechloromonas aromatica</i> RCB                       | Proteobacteria (beta)  | NC_007298                           | FL         | 4,50            | 59  | 4283       | 4204 | 3201      | 4           |            |              | 4            |              |              |              |              |                         |    |     |     | 64   | 436               | 103                  |               |              |
| <i>Methylobacillus flagellatus</i> KT                    | Proteobacteria (beta)  | NC_007947                           | FL         | 2,97            | 56  | 2822       | 2759 | 2203      | 2           |            |              | 2            |              |              |              |              |                         |    |     |     | 46   | 685               | 63                   | 3 days        | [60]         |
| <i>Neisseria gonorrhoeae</i> FA 1090                     | Proteobacteria (beta)  | NC_002946                           | FHA        | 2,15            | 53  | 2069       | 2002 | 1418      | 4           |            |              | 4            |              |              |              |              |                         |    |     |     | 55   | 591               | 32                   | 48h           | [2]          |
| <i>Neisseria meningitidis</i> MC58                       | Proteobacteria (beta)  | NC_003112                           | FHA        | 2,27            | 52  | 2134       | 2063 | 1536      | 4           |            |              | 4            |              |              |              |              |                         |    |     |     | 59   | 664               | 28                   | 48h           | [2]          |

| Genome Name                                          | Phylum                   | Refseq               | Lifestyle* | Genome Size(Mb) | GC% | Gene Count | CDS  | COG Genes | operon nber | 16s_23s_5s | 16s_1_23s_5s | 16s_2_23s_5s | 16s_3_23s_5s | 16s_5_23s_5s | 16s_4_23s_5s | 16s_23s_1_5s | additional <sup>§</sup> | 5s | 23s | 16s | tRNA | ITS_length (Mean) | Genes for Regulation | # Growth time | [References] |
|------------------------------------------------------|--------------------------|----------------------|------------|-----------------|-----|------------|------|-----------|-------------|------------|--------------|--------------|--------------|--------------|--------------|--------------|-------------------------|----|-----|-----|------|-------------------|----------------------|---------------|--------------|
|                                                      |                          |                      |            |                 |     |            |      |           |             |            |              |              |              |              |              |              |                         |    |     |     |      |                   |                      |               |              |
| <i>Neisseria meningitidis</i> Z2491                  | Proteobacteria (beta)    | NC_003116            | FHA        | 2,18            | 52  | 2147       | 2065 | 1546      | 4           |            |              | 4            |              |              |              |              |                         |    |     |     | 58   | 653               | 31                   | 48h           | [2]          |
| <i>Nitrosomonas europaea</i> ATCC 19718              | Proteobacteria (beta)    | NC_004757            | FL         | 2,81            | 51  | 2628       | 2572 | 1995      | 1           |            |              | 1            |              |              |              |              |                         | 1  |     |     | 41   | 406               | 46                   | 7 days        | [61]         |
| <i>Nitrosospira multiformis</i> ATCC 25196           | Proteobacteria (beta)    | NC_007614            | FL         | 3,23            | 54  | 2876       | 2827 | 2102      | 1           |            |              | 1            |              |              |              |              |                         |    |     |     | 43   | 657               | 38                   | 5 days        | [62]         |
| <i>Ralstonia eutropha</i> H16                        | Proteobacteria (beta)    | NC_008313<br>NC_8314 | FL         | 6,96            | 67  | 6279       | 6206 | 5102      | 5           | 1          |              | 4            |              |              |              |              |                         |    |     |     | 58   | 524               | 307                  | 24 - 48h      | [63]         |
| <i>Rhodoferax ferrireducens</i> T118                 | Proteobacteria (beta)    | NC_007908            | FL         | 4,97            | 60  | 4555       | 4495 | 3505      | 2           |            |              | 2            |              |              |              |              |                         |    |     |     | 44   | 625               | 139                  | 5 days        | [64]         |
| <i>Thiobacillus denitrificans</i> ATCC 25259         | Proteobacteria (beta)    | NC_007404            | FL         | 2,91            | 66  | 2879       | 2827 | 2228      | 2           |            |              | 2            |              |              |              |              |                         |    |     |     | 43   | 803               | 66                   | 4 - 5 days    | [65]         |
| <i>Anaeromyxobacter dehalogenans</i> 2CP-C           | Proteobacteria (delta)   | NC_007760            | FL         | 5,01            | 75  | 4419       | 4361 | 3085      | 2           |            |              | 2            |              |              |              |              |                         |    |     |     | 49   | 566               | 62                   | 3 - 5 days    | [66]         |
| <i>Bdellovibrio bacteriovorus</i> HD100              | Proteobacteria (delta)   | NC_005363            | FHA        | 3,78            | 51  | 3631       | 3587 | 2132      | 2           |            | 2            |              |              |              |              |              |                         |    |     |     | 36   | 328               | 46                   | 3 - 5 days    | [67]         |
| <i>Desulfotalea psychrophila</i> LSV54               | Proteobacteria (delta)   | NC_006138            | FL         | 3,66            | 47  | 3321       | 3234 | 2313      | 7           | 5          |              | 2            |              |              |              |              |                         | 1  |     |     | 64   | 443               | 49                   | 3 - 5 days    | [68]         |
| <i>Desulfovibrio vulgaris vulgaris</i> Hildenborough | Proteobacteria (delta)   | NC_002937            | FL         | 3,77            | 63  | 3626       | 3531 | 2351      | 5           |            |              | 5            |              |              |              |              |                         | 1  |     |     | 68   | 416               | 61                   | 3 - 5 days    | [69]         |
| <i>Geobacter metallireducens</i> GS-15               | Proteobacteria (delta)   | NC_007517            | FL         | 4,01            | 59  | 3635       | 3576 | 2721      | 2           |            |              | 2            |              |              |              |              |                         |    |     |     | 50   | 430               | 78                   | GT 24h        | [70,71]      |
| <i>Geobacter sulfurreducens</i> PCA                  | Proteobacteria (delta)   | NC_002939            | FL         | 3,81            | 61  | 3503       | 3446 | 2527      | 2           |            |              | 2            |              |              |              |              |                         |    |     |     | 49   | 454               | 76                   | 24 - 48h      | [72]         |
| <i>Myxococcus xanthus</i> DK 1622                    | Proteobacteria (delta)   | NC_008095            | FL         | 9,14            | 69  | 7410       | 7331 | 4347      | 4           |            | 2            | 2            |              |              |              |              |                         |    |     |     | 65   | 705               | 116                  | GT 5-6h       | [73]         |
| <i>Pelobacter carbinolicus</i> DSM 2380              | Proteobacteria (delta)   | NC_007498            | FL         | 3,67            | 55  | 3211       | 3148 | 2482      | 2           |            |              | 2            |              |              |              |              |                         |    |     |     | 54   | 528               | 60                   |               |              |
| <i>Syntrophus aciditrophicus</i> SB                  | Proteobacteria (delta)   | NC_007759            | FL         | 3,18            | 51  | 3219       | 3168 | 2164      | 1           |            |              | 1            |              |              |              |              |                         |    |     |     | 48   | 440               | 42                   | GT 24 - 50h   | [74]         |
| <i>Campylobacter jejuni</i> jejuni NCTC 11168        | Proteobacteria (epsilon) | NC_002163            | FHA        | 1,64            | 31  | 1686       | 1629 | 1294      | 3           |            |              | 3            |              |              |              |              |                         |    |     |     | 44   | 906               | 14                   | 24 - 48h      | [2]          |
| <i>Campylobacter jejuni</i> RM1221                   | Proteobacteria (epsilon) | NC_003912            | FHA        | 1,78            | 30  | 1891       | 1838 | 1301      | 3           |            |              | 3            |              |              |              |              |                         |    |     |     | 44   | 807               | 12                   | 24 - 48h      | [2]          |
| <i>Helicobacter acinonychis</i> Sheeba               | Proteobacteria (epsilon) | NC_008229            | FHA        | 1,56            | 38  | 1660       | 1618 | 1078      | 0           |            |              |              |              |              |              |              |                         | 2  | 2   | 2   | 36   |                   | 6                    | 3 - 5 days    | [2]          |
| <i>Helicobacter hepaticus</i> ATCC 51449             | Proteobacteria (epsilon) | NC_004917            | FHA        | 1,80            | 36  | 1918       | 1875 | 1249      | 1           |            |              | 1            |              |              |              |              |                         |    |     |     | 37   | 502               | 14                   | 3 - 5 days    | [2]          |
| <i>Helicobacter pylori</i> 26695                     | Proteobacteria (epsilon) | NC_000915            | FHA        | 1,67            | 39  | 1623       | 1576 | 1104      | 0           |            |              |              |              |              |              |              |                         | 3  | 2   | 2   | 36   |                   | 7                    | 3 - 5 days    | [2]          |
| <i>Helicobacter pylori</i> HPAG1                     | Proteobacteria (epsilon) | NC_008086            | FHA        | 1,61            | 39  | 1586       | 1544 | 1094      | 0           |            |              |              |              |              |              |              |                         | 2  | 2   | 2   | 36   |                   | 7                    | 3 - 5 days    | [2]          |
| <i>Helicobacter pylori</i> J99                       | Proteobacteria (epsilon) | NC_000921            | FHA        | 1,64            | 39  | 1536       | 1491 | 1087      | 0           |            |              |              |              |              |              |              |                         | 1  | 1   | 1   | 35   |                   | 8                    | 3 - 5 days    | [2]          |
| <i>Thiomicrospira crunogena</i> XCL-2                | Proteobacteria (epsilon) | NC_007520            | FL         | 2,43            | 43  | 2255       | 2200 | 1785      | 3           |            |              | 3            |              |              |              |              |                         |    |     |     | 43   | 835               | 39                   | 24 - 48h      | [75]         |
| <i>Wolinella succinogenes</i> DSM 1740               | Proteobacteria (epsilon) | NC_005090            | FHA        | 2,11            | 48  | 2096       | 2043 | 1639      | 3           |            |              | 3            |              |              |              |              |                         |    |     |     | 40   | 560               | 25                   | 24 - 48h      | [2]          |
| <i>Acinetobacter</i> sp. ADP1                        | Proteobacteria (gamma)   | NC_005966            | FL         | 3,60            | 40  | 3425       | 3325 | 2583      | 7           |            |              | 7            |              |              |              |              |                         |    |     |     | 76   | 594               | 103                  | 24 - 48h      | [76]         |
| <i>Aeromonas hydrophila hydrophila</i> ATCC 7966     | Proteobacteria (gamma)   | NC_008570            | FL         | 4,74            | 62  | 4281       | 4122 | 3426      | 10          |            | 7            | 3            |              |              |              |              |                         |    |     |     | 128  | 506               | 148                  | 24 - 48h      | [77]         |
| <i>Alcanivorax borkumensis</i> SK2                   | Proteobacteria (gamma)   | NC_008260            | FL         | 3,12            | 55  | 2806       | 2755 | 2274      | 3           | 2          |              | 1            |              |              |              |              |                         |    |     |     | 42   | 334               | 75                   | 3 - 5 days    | [78,79]      |
| <i>Baumannia cicadellinicola</i> Hc                  | Proteobacteria (gamma)   | NC_007984            | M          | 0,69            | 33  | 641        | 595  | 584       | 2           |            | 2            |              |              |              |              |              |                         |    |     |     | 39   | 271               | 6                    | > 7 days      | [80]         |

| Genome Name                                              | Phylum                 | Refseq    | Lifestyle* | Genome Size(Mb) | GC% | Gene Count | CDS  | COG Genes | operon nber | 16s_23s_5s | 16s_1_23s_5s | 16s_2_23s_5s | 16s_3_23s_5s | 16s_4_23s_5s | 16s_5_23s_5s | 16s_23s_1_5s | additional <sup>§</sup> | 5s | 23s | 16s | tRNA | ITS_length (Mean) | Genes for Regulation | # Growth time | [References] |
|----------------------------------------------------------|------------------------|-----------|------------|-----------------|-----|------------|------|-----------|-------------|------------|--------------|--------------|--------------|--------------|--------------|--------------|-------------------------|----|-----|-----|------|-------------------|----------------------|---------------|--------------|
|                                                          |                        |           |            |                 |     |            |      |           |             |            |              |              |              |              |              |              |                         |    |     |     |      |                   |                      |               |              |
| <i>Buchnera aphidicola</i> APS                           | Proteobacteria (gamma) | NC_002528 | M          | 0,66            | 26  | 610        | 574  | 561       | 0           |            |              |              |              |              |              |              |                         | 1  | 1   | 1   | 32   | 1                 |                      |               |              |
| <i>Buchnera aphidicola</i> Bp                            | Proteobacteria (gamma) | NC_004545 | M          | 0,62            | 25  | 546        | 507  | 494       | 0           |            |              |              |              |              |              |              |                         | 1  | 1   | 1   | 32   | 2                 |                      |               |              |
| <i>Buchnera aphidicola</i> Cc                            | Proteobacteria (gamma) | NC_008513 | M          | 0,42            | 20  | 394        | 357  | 350       | 0           |            |              |              |              |              |              |              |                         | 1  | 1   | 1   | 31   | 0                 |                      |               |              |
| <i>Buchnera aphidicola</i> Sg                            | Proteobacteria (gamma) | NC_004061 | M          | 0,64            | 25  | 585        | 546  | 537       | 0           |            |              |              |              |              |              |              |                         | 1  | 1   | 1   | 32   | 2                 |                      |               |              |
| <i>Candidatus Blochmannia floridanus</i>                 | Proteobacteria (gamma) | NC_005061 | M          | 0,71            | 27  | 626        | 583  | 574       | 0           |            |              |              |              |              |              |              |                         | 1  | 1   | 1   | 37   | 307               | 2                    |               |              |
| <i>Candidatus Blochmannia pennsylvanicus</i> BPEN        | Proteobacteria (gamma) | NC_007292 | M          | 0,79            | 30  | 654        | 610  | 599       | 0           |            |              |              |              |              |              |              |                         | 1  | 1   | 1   | 39   | 498               | 3                    |               |              |
| <i>Candidatus Carsonella ruddii</i> PV                   | Proteobacteria (gamma) | NC_008512 | M          | 0,16            | 17  | 213        | 182  | 133       | 1           | 1          |              |              |              |              |              |              |                         |    |     |     | 28   | 46                | 0                    |               |              |
| <i>Colwellia psychrerythraea</i> 34H                     | Proteobacteria (gamma) | NC_003910 | FL         | 5,37            | 38  | 5027       | 4910 | 3320      | 9           | 9          |              |              |              |              |              |              |                         | 1  |     |     | 88   | 610               | 184                  | 24 - 48h      | [2]          |
| <i>Coxiella burnetii</i> RSA 493                         | Proteobacteria (gamma) | NC_002971 | P          | 2,03            | 43  | 2099       | 2052 | 1256      | 1           |            | 1            |              |              |              |              |              |                         |    |     |     | 42   | 543               | 21                   | > 7 days      | [81]         |
| <i>Erwinia carotovora atroseptica</i> SCRI1043           | Proteobacteria (gamma) | NC_004547 | FL         | 5,06            | 51  | 4594       | 4472 | 3553      | 7           | 4          | 3            |              |              |              |              |              |                         | 1  |     |     | 76   | 445               | 180                  | 24 - 48h      | [2]          |
| <i>Escherichia coli</i> 536+A166                         | Proteobacteria (gamma) | NC_008253 | FL         | 4,94            | 51  | 4732       | 4629 | 3705      | 7           | 6          | 1            |              |              |              |              |              |                         | 1  |     |     | 81   | 441               | 194                  | 24 - 48h      | [2]          |
| <i>Escherichia coli</i> APEC O1                          | Proteobacteria (gamma) | NC_008563 | FL         | 5,08            | 51  | 4583       | 4467 | 3625      | 7           | 7          |              |              |              |              |              |              |                         | 1  |     |     | 94   | 351               | 191                  | 24 - 48h      |              |
| <i>Escherichia coli</i> CFT073                           | Proteobacteria (gamma) | NC_004431 | FL         | 5,23            | 50  | 5562       | 5379 | 3814      | 7           | 5          | 2            |              |              |              |              |              |                         | 1  |     |     | 89   | 355               | 205                  | 24 - 48h      |              |
| <i>Escherichia coli</i> K12                              | Proteobacteria (gamma) | NC_000913 | FL         | 4,64            | 51  | 4400       | 4243 | 3566      | 7           | 4          | 3            |              |              |              |              |              |                         | 2  |     |     | 86   | 355               | 185                  | 24 - 48h      |              |
| <i>Escherichia coli</i> O157:H7 EDL933                   | Proteobacteria (gamma) | NC_002655 | FL         | 5,62            | 50  | 5552       | 5423 | 3990      | 7           | 4          | 3            |              |              |              |              |              |                         | 2  |     |     | 98   | 355               | 198                  | 24 - 48h      |              |
| <i>Escherichia coli</i> O157:H7 Sakai                    | Proteobacteria (gamma) | NC_002695 | FL         | 5,59            | 50  | 5482       | 5341 | 3915      | 7           | 4          | 3            |              |              |              |              |              |                         | 2  |     |     | 105  | 352               | 197                  | 24 - 48h      |              |
| <i>Escherichia coli</i> UTI89                            | Proteobacteria (gamma) | NC_007946 | FL         | 5,18            | 51  | 5321       | 5211 | 3792      | 7           | 4          | 3            |              |              |              |              |              |                         | 1  |     |     | 88   | 438               | 197                  | 24 - 48h      |              |
| <i>Escherichia coli</i> W3110                            | Proteobacteria (gamma) | AC_000091 | FL         | 4,65            | 51  | 4492       | 4227 | 3565      | 7           | 4          | 3            |              |              |              |              |              |                         | 2  |     |     | 91   | 355               | 185                  | 24 - 48h      |              |
| <i>Francisella tularensis holarctica</i> OSU18           | Proteobacteria (gamma) | NC_007880 | FHA        | 1,90            | 32  | 1604       | 1555 | 1168      | 3           |            | 3            |              |              |              |              |              |                         | 1  |     |     | 38   | 318               | 18                   | 2 - 4 days    | [82]         |
| <i>Francisella tularensis tularensis</i> SCHU S4         | Proteobacteria (gamma) | NC_006570 | FHA        | 1,89            | 32  | 1651       | 1603 | 1218      | 3           |            | 3            |              |              |              |              |              |                         | 1  |     |     | 38   | 336               | 20                   | 2 - 4 days    |              |
| <i>Haemophilus ducreyi</i> 35000HP                       | Proteobacteria (gamma) | NC_002940 | FHA        | 1,70            | 38  | 1795       | 1717 | 1256      | 6           | 3          | 3            |              |              |              |              |              |                         | 1  |     |     | 47   | 352               | 24                   | 24 - 48h      | [2]          |
| <i>Haemophilus influenzae</i> 86-028NP                   | Proteobacteria (gamma) | NC_007146 | FHA        | 1,91            | 38  | 1868       | 1791 | 1513      | 6           | 3          | 3            |              |              |              |              |              |                         | 1  |     |     | 58   | 478               | 43                   | 24 - 48h      |              |
| <i>Haemophilus influenzae</i> Rd KW20                    | Proteobacteria (gamma) | NC_000907 | FHA        | 1,83            | 38  | 1749       | 1657 | 1529      | 6           | 3          | 3            |              |              |              |              |              |                         | 1  |     |     | 58   | 478               | 43                   | 24 - 48h      |              |
| <i>Hahella chejuensis</i> KCTC 2396                      | Proteobacteria (gamma) | NC_007645 | FL         | 7,22            | 54  | 6860       | 6778 | 4156      | 5           |            | 5            |              |              |              |              |              |                         |    |     |     | 67   | 632               | 190                  | 24 - 48h      | [2]          |
| <i>Idiomarina loihiensis</i> L2TR                        | Proteobacteria (gamma) | NC_006512 | FL         | 2,84            | 47  | 2699       | 2628 | 2133      | 4           |            | 4            |              |              |              |              |              |                         |    |     |     | 56   | 591               | 71                   | 24 - 48h      | [83]         |
| <i>Legionella pneumophila</i> Lens                       | Proteobacteria (gamma) | NC_006369 | FHA        | 3,41            | 38  | 2988       | 2934 | 2027      | 3           | 3          |              |              |              |              |              |              |                         |    |     |     | 43   | 346               | 41                   | 48 - 72h      | [2]          |
| <i>Legionella pneumophila</i> Paris                      | Proteobacteria (gamma) | NC_006368 | FHA        | 3,64            | 38  | 3220       | 3166 | 2142      | 3           | 3          |              |              |              |              |              |              |                         |    |     |     | 43   | 346               | 47                   | 48 - 72h      |              |
| <i>Legionella pneumophila pneumophila</i> Philadelphia 1 | Proteobacteria (gamma) | NC_002942 | FHA        | 3,40            | 38  | 2994       | 2942 | 2040      | 3           | 3          |              |              |              |              |              |              |                         |    |     |     | 43   | 384               | 46                   | 48 - 72h      |              |

| Genome Name                                                         | Phylum                 | Refseq                 | Lifestyle* | Genome Size(Mb) | GC% | Gene Count | CDS  | COG Genes | operon nber | 16S rRNA   |              |              |              |              |              |              | tRNA | ITS_ length (Mean) | Genes for Regulation | # Growth time [References] |                         |               |
|---------------------------------------------------------------------|------------------------|------------------------|------------|-----------------|-----|------------|------|-----------|-------------|------------|--------------|--------------|--------------|--------------|--------------|--------------|------|--------------------|----------------------|----------------------------|-------------------------|---------------|
|                                                                     |                        |                        |            |                 |     |            |      |           |             | 16s_23s_5s | 16s_1_23s_5s | 16s_2_23s_5s | 16s_3_23s_5s | 16s_5_23s_5s | 16s_4_23s_5s | 16s_23s_1_5s |      |                    |                      |                            | additional <sup>s</sup> | 5s            |
| <i>Mannheimia succiniciproducens</i> MBEL55E                        | Proteobacteria (gamma) | NC_006300              | FHA        | 2,31            | 43  | 2459       | 2380 | 1882      | 5           | 3          | 2            |              |              |              |              | 2            | 1    | 1                  | 60                   | 401                        | 68                      | 24 - 48h [2]  |
| <i>Methylococcus capsulatus</i> Bath                                | Proteobacteria (gamma) | NC_002977              | FL         | 3,30            | 64  | 3014       | 2960 | 2205      | 2           |            | 2            |              |              |              |              |              |      |                    | 46                   | 568                        | 44                      | 24 - 48h [84] |
| <i>Nitrosococcus oceani</i> ATCC 19707                              | Proteobacteria (gamma) | NC_007484              | FL         | 3,52            | 50  | 3186       | 3132 | 2290      | 2           | 1          | 1            |              |              |              |              |              |      |                    | 45                   | 715                        | 51                      |               |
| <i>Pasteurella multocida multocida</i> Pm70                         | Proteobacteria (gamma) | NC_002663              | FHA        | 2,26            | 40  | 2100       | 2015 | 1819      | 6           | 3          | 3            |              |              |              | 1            |              |      |                    | 57                   | 386                        | 52                      | 24 - 48h [2]  |
| <i>Photobacterium profundum</i> SS9                                 | Proteobacteria (gamma) | NC_006370<br>NC_006371 | FL         | 6,40            | 42  | 5738       | 5491 | 3980      | 15          | 5          | 3            | 7            |              |              | 2            |              |      |                    | 163                  | 339                        | 196                     |               |
| <i>Photorhabdus luminescens laumondii</i> TTO1                      | Proteobacteria (gamma) | NC_005126              | FL         | 5,69            | 43  | 4825       | 4683 | 3186      | 7           | 4          | 3            |              |              |              | 1            |              |      |                    | 85                   | 346                        | 134                     | 24 - 48h [2]  |
| <i>Pseudoalteromonas haloplanktis</i> TAC125                        | Proteobacteria (gamma) | NC_007481              | FL         | 3,85            | 40  | 3620       | 3486 | 2639      | 9           | 7          | 2            |              |              |              | 1            |              |      |                    | 106                  | 301                        | 99                      |               |
| <i>Pseudomonas aeruginosa</i> PAO1                                  | Proteobacteria (gamma) | NC_002516              | FL         | 6,26            | 67  | 5657       | 5566 | 4592      | 4           |            | 4            |              |              |              | 1            |              |      |                    | 63                   | 472                        | 238                     | 24 - 48h [2]  |
| <i>Pseudomonas aeruginosa</i> UCBPP-PA14                            | Proteobacteria (gamma) | NC_008463              | FL         | 6,54            | 66  | 5964       | 5892 | 4696      | 4           |            | 4            |              |              |              |              |              |      |                    | 59                   | 473                        | 243                     | 24 - 48h      |
| <i>Pseudomonas entomophila</i> L48                                  | Proteobacteria (gamma) | NC_008027              | FL         | 5,89            | 64  | 5241       | 5134 | 4018      | 7           |            | 7            |              |              |              | 1            |              |      |                    | 78                   | 513                        | 190                     | 24 - 48h      |
| <i>Pseudomonas fluorescens</i> Pf-5                                 | Proteobacteria (gamma) | NC_004129              | FL         | 7,07            | 63  | 6224       | 6137 | 4869      | 5           |            | 5            |              |              |              |              |              |      |                    | 71                   | 527                        | 264                     | 24 - 48h      |
| <i>Pseudomonas fluorescens</i> PfO-1                                | Proteobacteria (gamma) | NC_007492              | FL         | 6,44            | 61  | 5833       | 5738 | 4533      | 6           |            | 6            |              |              |              | 1            |              |      |                    | 73                   | 510                        | 241                     | 24 - 48h      |
| <i>Pseudomonas putida</i> KT2440                                    | Proteobacteria (gamma) | NC_002947              | FL         | 6,18            | 62  | 5473       | 5350 | 4199      | 7           | 4          | 3            |              |              |              | 1            |              |      |                    | 74                   | 510                        | 208                     | 24 - 48h      |
| <i>Pseudomonas syringae</i> pv. <i>phaseolicola</i> 1448A           | Proteobacteria (gamma) | NC_005773              | FL         | 6,11            | 58  | 5250       | 5170 | 4050      | 5           |            | 5            |              |              |              |              |              |      |                    | 64                   | 553                        | 184                     | 24 - 48h      |
| <i>Pseudomonas syringae</i> pv. <i>syringae</i> B728a               | Proteobacteria (gamma) | NC_007005              | FL         | 6,09            | 59  | 5219       | 5136 | 4020      | 5           |            | 5            |              |              |              | 1            |              |      |                    | 64                   | 550                        | 192                     | 24 - 48h      |
| <i>Pseudomonas syringae</i> pv. <i>tomato</i> DC3000                | Proteobacteria (gamma) | NC_004578              | FL         | 6,54            | 58  | 5686       | 5608 | 4177      | 5           |            | 5            |              |              |              | 1            |              |      |                    | 63                   | 544                        | 190                     | 24 - 48h      |
| <i>Psychrobacter arcticus</i> 273-4                                 | Proteobacteria (gamma) | NC_007204              | FL         | 2,65            | 43  | 2211       | 2147 | 1694      | 4           |            | 4            |              |              |              |              |              |      |                    | 49                   | 594                        | 42                      |               |
| <i>Saccharophagus degradans</i> 2-40                                | Proteobacteria (gamma) | NC_007912              | FL         | 5,06            | 46  | 4067       | 4017 | 2796      | 2           | 2          |              |              |              |              |              |              |      |                    | 41                   | 2881                       | 98                      | 24 - 48h [85] |
| <i>Salmonella enterica enterica</i> sv <i>Choleraesuis</i> SC-B67   | Proteobacteria (gamma) | NC_006905              | FHA        | 4,94            | 52  | 4769       | 4662 | 3513      | 7           | 4          | 3            |              |              |              | 1            |              |      |                    | 85                   | 354                        | 167                     | 24 - 48h [2]  |
| <i>Salmonella enterica enterica</i> sv <i>Paratyphi</i> A ATCC 9150 | Proteobacteria (gamma) | NC_006511              | FHA        | 4,59            | 52  | 4233       | 4093 | 3320      | 7           | 4          | 3            |              |              |              | 2            |              |      |                    | 82                   | 352                        | 153                     | 24 - 48h      |
| <i>Salmonella enterica enterica</i> sv <i>Typhi</i> CT18            | Proteobacteria (gamma) | NC_003198              | FHA        | 5,13            | 52  | 4923       | 4758 | 3522      | 7           | 4          | 3            |              |              |              | 2            |              |      |                    | 81                   | 355                        | 168                     | 24 - 48h      |
| <i>Salmonella enterica enterica</i> sv <i>Typhi</i> Ty2             | Proteobacteria (gamma) | NC_004631              | FHA        | 4,79            | 52  | 4478       | 4318 | 3408      | 7           | 4          | 3            |              |              |              | 1            |              |      |                    | 79                   | 356                        | 161                     | 24 - 48h      |
| <i>Salmonella typhimurium</i> LT2                                   | Proteobacteria (gamma) | NC_003197              | FHA        | 4,95            | 52  | 4699       | 4527 | 3663      | 7           | 4          | 3            |              |              |              | 2            |              |      |                    | 87                   | 353                        | 176                     | 24 - 48h      |
| <i>Shewanella oneidensis</i> MR-1                                   | Proteobacteria (gamma) | NC_004347              | FL         | 5,13            | 46  | 4618       | 4472 | 3195      | 9           | 6          | 3            |              |              |              | 1            |              |      |                    | 102                  | 316                        | 128                     | 24 - 48h [2]  |
| <i>Shigella boydii</i> Sb227                                        | Proteobacteria (gamma) | NC_007613              | FHA        | 4,65            | 51  | 4397       | 4284 | 3470      | 7           | 2          | 5            |              |              |              | 1            |              |      |                    | 91                   | 447                        | 133                     | 24 - 48h [2]  |
| <i>Shigella dysenteriae</i> Sd197                                   | Proteobacteria (gamma) | NC_007606              | FHA        | 4,55            | 51  | 4604       | 4497 | 3725      | 7           | 4          | 3            |              |              |              |              |              |      |                    | 85                   | 438                        | 135                     | 24 - 48h      |
| <i>Shigella flexneri</i> 2a 2457T                                   | Proteobacteria (gamma) | NC_004741              | FHA        | 4,60            | 51  | 4262       | 4068 | 3457      | 7           | 4          | 3            |              |              |              | 2            |              |      |                    | 100                  | 355                        | 135                     | 24 - 48h      |
| <i>Shigella flexneri</i> 2a 301                                     | Proteobacteria (gamma) | NC_004337              | FHA        | 4,83            | 51  | 4572       | 4443 | 3637      | 7           | 5          | 1            | 1            |              |              | 2            |              |      |                    | 97                   | 355                        | 133                     | 24 - 48h      |

| Genome Name                                                                   | Phylum                 | Refseq                 | Lifestyle* | Genome Size(Mb) | GC% | Gene Count | CDS  | COG Genes | operon nber | rDNA operon organization |              |              |              |              |              | additional <sup>§</sup> | 5s | 23s | 16s | tRNA | ITS_ length (Mean) | Genes for Regulation | # Growth time [References] |
|-------------------------------------------------------------------------------|------------------------|------------------------|------------|-----------------|-----|------------|------|-----------|-------------|--------------------------|--------------|--------------|--------------|--------------|--------------|-------------------------|----|-----|-----|------|--------------------|----------------------|----------------------------|
|                                                                               |                        |                        |            |                 |     |            |      |           |             | 16s_23s_5s               | 16s_1_23s_5s | 16s_2_23s_5s | 16s_3_23s_5s | 16s_4_23s_5s | 16s_5_23s_5s |                         |    |     |     |      |                    |                      |                            |
| <i>Shigella flexneri</i> 5 8401                                               | Proteobacteria (gamma) | NC_008258              | FHA        | 4,57            | 51  | 4235       | 4116 | 3446      | 7           | 7                        |              |              |              |              |              | 1                       |    |     | 97  | 355  | 134                | 24 - 48h             |                            |
| <i>Shigella sonnei</i> Ss046                                                  | Proteobacteria (gamma) | NC_007384              | FHA        | 5,04            | 51  | 4580       | 4461 | 3753      | 7           | 5                        | 2            |              |              |              |              | 1                       |    |     | 97  | 447  | 134                | 24 - 48h             |                            |
| <i>Thiomicrospira denitrificans</i> ATCC 33889                                | Proteobacteria (gamma) | NC_007575              | FL         | 2,20            | 34  | 2163       | 2104 | 1597      | 4           | 4                        |              |              |              |              |              |                         |    | 44  | 547 | 23   | 24 - 48h           | [2]                  |                            |
| <i>Vibrio cholerae</i> O1 bv eltor N16961                                     | Proteobacteria (gamma) | NC_002505              | FL         | 4,03            | 47  | 3989       | 3835 | 2894      | 8           | 3                        | 3            | 1            |              |              | 1            |                         |    | 98  | 427 | 136  | 24 - 48h           | [2]                  |                            |
| <i>Vibrio fischeri</i> ES114                                                  | Proteobacteria (gamma) | NC_006840<br>NC_006841 | FL         | 4,28            | 38  | 3957       | 3802 | 3026      | 12          | 2                        | 3            | 3            |              | 1            | 1            |                         |    | 118 | 361 | 133  | 24 - 48h           |                      |                            |
| <i>Vibrio parahaemolyticus</i> RIMD 2210633                                   | Proteobacteria (gamma) | NC_004603<br>NC_004605 | FL         | 5,17            | 45  | 4992       | 4832 | 3529      | 11          | 3                        | 1            | 3            |              | 2            | 1            |                         |    | 126 | 358 | 160  | 24 - 48h           |                      |                            |
| <i>Vibrio vulnificus</i> CMCP6                                                | Proteobacteria (gamma) | NC_004459<br>NC_004460 | FL         | 5,13            | 47  | 4658       | 4488 | 3474      | 9           | 3                        | 2            | 1            |              | 2            | 1            |                         |    | 111 | 418 | 162  | 24 - 48h           |                      |                            |
| <i>Vibrio vulnificus</i> YJ016                                                | Proteobacteria (gamma) | NC_005139<br>NC_005140 | FL         | 5,26            | 47  | 5167       | 5024 | 3509      | 9           | 3                        | 1            | 3            |              | 2            |              |                         |    | 112 | 421 | 172  | 24 - 48h           |                      |                            |
| <i>Wigglesworthia glossinidia</i> endosymbiont of <i>Glossina brevipalpis</i> | Proteobacteria (gamma) | NC_004344              | M          | 0,70            | 22  | 657        | 617  | 598       | 2           | 2                        |              |              |              |              |              |                         |    | 34  | 271 | 3    | > 7 days           | [86]                 |                            |
| <i>Yersinia pestis</i> Antiqua                                                | Proteobacteria (gamma) | NC_008150              | FHA        | 4,88            | 48  | 4471       | 4368 | 3533      | 7           | 4                        | 3            |              |              |              |              |                         |    | 68  | 466 | 131  | 24 - 48h           | [2]                  |                            |
| <i>Yersinia pestis</i> biovar Microtus 91001                                  | Proteobacteria (gamma) | NC_005810              | FHA        | 4,80            | 48  | 4278       | 4142 | 3260      | 7           | 3                        | 4            |              |              | 1            |              |                         |    | 72  | 492 | 128  | 24 - 48h           |                      |                            |
| <i>Yersinia pestis</i> CO92                                                   | Proteobacteria (gamma) | NC_003143              | FHA        | 4,83            | 48  | 4199       | 4066 | 3278      | 6           | 3                        | 3            |              |              | 1            |              |                         |    | 70  | 466 | 123  | 24 - 48h           |                      |                            |
| <i>Yersinia pestis</i> KIM                                                    | Proteobacteria (gamma) | NC_004088              | FHA        | 4,70            | 48  | 4337       | 4202 | 3257      | 7           | 5                        | 2            |              |              | 2            |              |                         |    | 73  | 422 | 126  | 24 - 48h           |                      |                            |
| <i>Yersinia pestis</i> Nepal516                                               | Proteobacteria (gamma) | NC_008149              | FHA        | 4,65            | 48  | 4204       | 4097 | 3344      | 7           | 5                        | 2            |              |              |              |              |                         |    | 72  | 525 | 126  | 24 - 48h           |                      |                            |
| <i>Yersinia pseudotuberculosis</i> IP 32953                                   | Proteobacteria (gamma) | NC_006155              | FHA        | 4,84            | 48  | 4159       | 4038 | 3240      | 7           | 4                        | 3            |              |              |              |              |                         |    | 85  | 509 | 128  | 24 - 48h           |                      |                            |
| <i>Borrelia burgdorferi</i> B31                                               | Spirochaetes           | NC_001318              | FHA        | 1,52            | 28  | 1663       | 1640 | 694       | 0           |                          |              |              |              | 2            | 2            | 1                       |    | 31  |     | 8    | GT 12 - 24h        | [87,88]              |                            |
| <i>Borrelia garinii</i> PBi                                                   | Spirochaetes           | NC_006156              | FHA        | 0,99            | 28  | 968        | 932  | 634       | 0           |                          |              |              |              | 2            | 1            | 1                       |    | 31  |     | 8    | 2 - 4 days         |                      |                            |
| <i>Leptospira borgpetersenii</i> sv <i>Hardjo-bovis</i> JB197                 | Spirochaetes           | NC_008510              | FHA        | 3,88            | 40  | 2920       | 2880 | 1884      | 0           |                          |              |              |              | 1            |              | 3                       |    | 37  |     | 52   | 21 days            | [89]                 |                            |
| <i>Leptospira borgpetersenii</i> sv <i>Hardjo-bovis</i> L550                  | Spirochaetes           | NC_008508              | FHA        | 3,93            | 40  | 2987       | 2945 | 1931      | 0           |                          |              |              |              | 1            | 2            | 2                       |    | 37  |     | 56   | 21 days            |                      |                            |
| <i>Leptospira interrogans</i> sv Copenhageni Fioacruz L1-130                  | Spirochaetes           | NC_005823              | FHA        | 4,63            | 35  | 3705       | 3658 | 2098      | 0           |                          |              |              |              | 1            | 2            | 2                       |    | 37  |     | 53   | 21 days            |                      |                            |
| <i>Leptospira interrogans</i> sv Lai 56601                                    | Spirochaetes           | NC_004342              | FHA        | 4,69            | 35  | 4774       | 4727 | 2177      | 0           |                          |              |              |              | 1            | 1            | 2                       |    | 37  |     | 55   | 21 days            |                      |                            |
| <i>Treponema denticola</i> ATCC 35405                                         | Spirochaetes           | NC_002967              | FHA        | 2,84            | 38  | 2824       | 2767 | 1626      | 2           | 2                        |              |              |              |              |              |                         |    | 44  | 385 | 50   | 3 - 5 days         | [90]                 |                            |
| <i>Treponema pallidum pallidum</i> Nichols                                    | Spirochaetes           | NC_000919              | P          | 1,14            | 53  | 1088       | 1036 | 729       | 2           | 2                        |              |              |              |              |              |                         |    | 45  | 294 | 13   | > 7 days           | [91]                 |                            |
| <i>Thermotoga maritima</i> MSB8                                               | Thermotogae            | NC_000853              | FL         | 1,86            | 46  | 1912       | 1858 | 1553      | 1           |                          | 1            |              |              |              |              |                         |    | 46  | 241 | 48   | 24 - 48h           | [92]                 |                            |

\* Lifestyle: M, obligate intracellular mutualist; P, obligate intracellular parasite; FHA, facultative host-associated; FL, free-living bacteria

Grey columns represent rDNA operon organization with numbers of tRNA indicated between 16s-23s and 23s-5s; and <sup>§</sup>additional 16s, 23s and/or 5s not included in the typical operon.

# Growth time corresponds to the Generation time (GT), Doubling time (DT), or Colonies (plaque essays) observation, as it has been indicated in the references.

## References

1. Coute Y, Hernandez C, Appel RD, Sanchez JC, Margolles A: **Labeling of Bifidobacterium longum cells with 13C-substituted leucine for quantitative proteomic analyses.** *Appl Environ Microbiol* 2007, **73**:5653-5656.
2. **CCUG: Culture Collection, University of Göteborg, Sweden** [<http://www.ccug.se/>]
3. Havlir DV, Ellner JJ: ***Mycobacterium avium* complex.** In *Principles and practice of infectious diseases*. 4th edition. Edited by Mandell GL, Douglas RG, Dolin R. New York: Churchill Livingstone; 1994:2250-2264.
4. Torres OH, Domingo P, Pericas R, Boiron P, Montiel JA, Vazquez G: **Infection caused by Nocardia farcinica: case report and review.** *Eur J Clin Microbiol Infect Dis* 2000, **19**:205-212.
5. [<http://www.freepatentsonline.com/7388085.html>]
6. Kelemen GH, Plaskitt KA, Lewis CG, Findlay KC, Buttner MJ: **Deletion of DNA lying close to the glkA locus induces ectopic sporulation in Streptomyces coelicolor A3(2).** *Mol Microbiol* 1995, **17**:221-230.
7. Ohno M, Okano I, Watsuji T, Kakinuma T, Ueda K, Beppu T: **Establishing the independent culture of a strictly symbiotic bacterium Symbiobacterium thermophilum from its supporting Bacillus strain.** *Biosci Biotechnol Biochem* 1999, **63**:1083-1090.
8. Fenollar F, Birg ML, Gauduchon V, Raoult D: **Culture of Tropheryma whipplei from human samples: a 3-year experience (1999 to 2002).** *J Clin Microbiol* 2003, **41**:3816-3822.
9. Deckert G, Warren PV, Gaasterland T, Young WG, Lenox AL, Graham DE, Overbeek R, Snead MA, Keller M, Aujay M et al.: **The complete genome of the hyperthermophilic bacterium Aquifex aeolicus.** *Nature* 1998, **392**:353-358.
10. Anton J, Oren A, Benlloch S, Rodriguez-Valera F, Amann R, Rossello-Mora R: **Salinibacter ruber gen. nov., sp. nov., a novel, extremely halophilic member of the Bacteria from saltern crystallizer ponds.** *Int J Syst Evol Microbiol* 2002, **52**:485-491.
11. Hackstadt T, Fischer ER, Scidmore MA, Rockey DD, Heinzen RA: **Origins and functions of the chlamydial inclusion.** *Trends Microbiol* 1997, **5**:288-293.
12. Hanada H, Ikeda-Dantsuji Y, Naito M, Nagayama A: **Infection of human fibroblast-like synovial cells with Chlamydia trachomatis results in persistent infection and interleukin-6 production.** *Microb Pathog* 2003, **34**:57-63.
13. Appino S, Pregel P, Manuali E, Vincenti L, Rota A, Carnieletto P, Tiberi C, Bollo E: **Infection of bovine oviduct cell cultures with Chlamydophila abortus.** *Animal Reproduction Science* 2007, **98**:350-356.
14. Ohya K, Takahara Y, Kuroda E, Koyasu S, Hagiwara S, Sakamoto M, Hisaka M, Morizane K, Ishiguro S, Yamaguchi T et al.: **Chlamydophila felis CF0218 is a novel TMH family protein with potential as a diagnostic antigen for diagnosis of C. felis infection.** *Clin Vaccine Immunol* 2008, **15**:1606-1615.

15. Tjhie JH, Roosendaal R, MacLaren DM, Vandenbroucke-Grauls CM: **Improvement of growth of *Chlamydia pneumoniae* on HEp-2 cells by pretreatment with polyethylene glycol in combination with additional centrifugation and extension of culture time.** *J Clin Microbiol* 1997, **35**:1883-1884.
16. **Chlorobium tepidum** [[http://www.ebi.ac.uk/2can/genomes/bacteria/Chlorobium\\_tepidum.html](http://www.ebi.ac.uk/2can/genomes/bacteria/Chlorobium_tepidum.html)]
17. Kube M, Beck A, Zinder SH, Kuhl H, Reinhardt R, Adrian L: **Genome sequence of the chlorinated compound-respiring bacterium *Dehalococcoides* species strain CBDB1.** *Nat Biotechnol* 2005, **23**:1269-1273.
18. Ernst A, Kirschenlohr H, Diez J, Boger P: **Glycogen content and nitrogenase activity in *Anabaena variabilis*.** *Arch Microbiol* 1984, **140**:120-125.
19. Selstam E, Campbell D: **Membrane lipid composition of the unusual cyanobacterium *Gloeobacter violaceus* sp. PCC 7421, which lacks sulfoquinovosyl diacylglycerol.** *Arch Microbiol* 1996, **166**:132-135.
20. Wolk CP, Cai Y, Cardemil L, Flores E, Hohn B, Murry M, Schmetterer G, Schrautemeier B, Wilson R: **Isolation and complementation of mutants of *Anabaena* sp. strain PCC 7120 unable to grow aerobically on dinitrogen.** *J Bacteriol* 1988, **170**:1239-1244.
21. Morris JJ, Kirkegaard R, Szul MJ, Johnson ZI, Zinser ER: **Facilitation of robust growth of *Prochlorococcus* colonies and dilute liquid cultures by "helper" heterotrophic bacteria.** *Appl Environ Microbiol* 2008, **74**:4530-4534.
22. Mori T, Binder B, Johnson CH: **Circadian gating of cell division in cyanobacteria growing with average doubling times of less than 24 hours.** *Proc Natl Acad Sci U S A* 1996, **93**:10183-10188.
23. Eriksson MJ, Schelin J, Miskiewicz E, Clarke AK: **Novel form of ClpB/HSP100 protein in the cyanobacterium *Synechococcus*.** *J Bacteriol* 2001, **183**:7392-7396.
24. Suzuki I, Sugiyami T, Omata T: **Regulation by cyanate of the genes involved in carbon and nitrogen assimilation in the cyanobacterium *Synechococcus* sp. strain PCC 7942.** *J Bacteriol* 1996, **178**:2688-2694.
25. Brahamsha B: **A genetic manipulation system for oceanic cyanobacteria of the genus *Synechococcus*.** *Appl Environ Microbiol* 1996, **62**:1747-1751.
26. Binder BJ, Chisholm SW: **Cell Cycle Regulation in Marine *Synechococcus* sp. Strains.** *Appl Environ Microbiol* 1995, **61**:708-717.
27. Bartsevich VV, Pakrasi HB: **Manganese transport in the cyanobacterium *Synechocystis* sp. PCC 6803.** *J Biol Chem* 1996, **271**:26057-26061.
28. Kirilovsky D, Roncel M, Boussac A, Wilson A, Zurita JL, Ducruet JM, Bottin H, Sugiura M, Ortega JM, Rutherford AW: **Cytochrome c550 in the cyanobacterium *Thermosynechococcus elongatus*: study of redox mutants.** *J Biol Chem* 2004, **279**:52869-52880.
29. Oshima T, Imahori K: **Description of *Thermus thermophilus* (Yoshida and Oshima) comb. nov., a nonsporulating thermophilic bacterium from a Japanese thermal spa.** *International Journal of Systematic Bacteriology* 1974, 102-112.

30. Williams RA, Smith KE, Welch SG, Micallef J, Sharp RJ: **DNA relatedness of Thermus strains, description of Thermus brockianus sp. nov., and proposal to reestablish Thermus thermophilus (Oshima and Imahori).** *Int J Syst Bacteriol* 1995, **45**:495-499.
31. Bai X, Zhang J, Ewing A, Miller SA, Jancso RA, Shevchenko DV, Tsukerman K, Walunas T, Lapidus A, Campbell JW et al.: **Living with genome instability: the adaptation of phytoplasmas to diverse environments of their insect and plant hosts.** *J Bacteriol* 2006, **188**:3682-3696.
32. Wu M, Ren Q, Durkin AS, Daugherty SC, Brinkac LM, Dodson RJ, Madupu R, Sullivan SA, Kolonay JF, Haft DH et al.: **Life in hot carbon monoxide: the complete genome sequence of Carboxydothemus hydrogenoformans Z-2901.** *PLoS Genet* 2005, **1**:e65.
33. Suyama A, Iwakiri R, Kai K, Tokunaga T, Sera N, Furukawa K: **Isolation and characterization of Desulfitobacterium sp. strain Y51 capable of efficient dehalogenation of tetrachloroethene and polychloroethanes.** *Biosci Biotechnol Biochem* 2001, **65**:1474-1481.
34. Nazina TN, Tourova TP, Poltarauk AB, Novikova EV, Grigoryan AA, Ivanova AE, Lysenko AM, Petrunyaka VV, Osipov GA, Belyaev SS et al.: **Taxonomic study of aerobic thermophilic bacilli: descriptions of Geobacillus subterraneus gen. nov., sp. nov. and Geobacillus uzenensis sp. nov. from petroleum reservoirs and transfer of Bacillus stearothermophilus, Bacillus thermocatenuatus, Bacillus thermoleovorans, Bacillus kaustophilus, Bacillus thermodenitrificans to Geobacillus as the new combinations G. stearothermophilus, G. th.** *Int J Syst Evol Microbiol* 2001, **51**:433-446.
35. Rodas AM, Ferrer S, Pardo I: **Polyphasic study of wine Lactobacillus strains: taxonomic implications.** *Int J Syst Evol Microbiol* 2005, **55**:197-207.
36. Nomura M, Kimoto H, Someya Y, Suzuki I: **Novel characteristic for distinguishing Lactococcus lactis subsp. lactis from subsp. cremoris.** *Int J Syst Bacteriol* 1999, **49 Pt 1**:163-166.
37. Fraser CM, Gocayne JD, White O, Adams MD, Clayton RA, Fleischmann RD, Bult CJ, Kerlavage AR, Sutton G, Kelley JM et al.: **The minimal gene complement of Mycoplasma genitalium.** *Science* 1995, **270**:397-403.
38. Miyata M, Yamamoto H, Shimizu T, Uenoyama A, Citti C, Rosengarten R: **Gliding mutants of Mycoplasma mobile: relationships between motility and cell morphology, cell adhesion and microcolony formation.** *Microbiology* 2000, **146 ( Pt 6)**:1311-1320.
39. Kannan TR, Baseman JB: **Hemolytic and hemoxidative activities in Mycoplasma penetrans.** *Infect Immun* 2000, **68**:6419-6422.
40. Vaisman N, von dW, I, da Mota FF, Seldin L: **Molecular detection of Oceanobacillus iheyensis in sand of Brazilian beaches.** *J Gen Appl Microbiol* 2008, **54**:305-310.
41. Dicks LM, Dellaglio F, Collins MD: **Proposal to reclassify Leuconostoc oenos as Oenococcus oeni [corrig.] gen. nov., comb. nov.** *Int J Syst Bacteriol* 1995, **45**:395-397.
42. Xue Y, Xu Y, Liu Y, Ma Y, Zhou P: **Thermoanaerobacter tengcongensis sp. nov., a novel anaerobic, saccharolytic, thermophilic bacterium isolated from a hot spring in Tengcong, China.** *Int J Syst Evol Microbiol* 2001, **51**:1335-1341.

43. Gade D, Stuhmann T, Reinhardt R, Rabus R: **Growth phase dependent regulation of protein composition in *Rhodopirellula baltica*.** *Environ Microbiol* 2005, **7**:1074-1084.
44. Munderloh UG, Lynch MJ, Herron MJ, Palmer AT, Kurtti TJ, Nelson RD, Goodman JL: **Infection of endothelial cells with *Anaplasma marginale* and *A. phagocytophilum*.** *Vet Microbiol* 2004, **101**:53-64.
45. Lin Q, Rikihisa Y, Felek S, Wang X, Massung RF, Woldehiwet Z: ***Anaplasma phagocytophilum* has a functional msp2 gene that is distinct from p44.** *Infect Immun* 2004, **72**:3883-3889.
46. Brenner DJ, O'Connor SP, Winkler HH, Steigerwalt AG: **Proposals to unify the genera *Bartonella* and *Rochalimaea*, with descriptions of *Bartonella quintana* comb. nov., *Bartonella vinsonii* comb. nov., *Bartonella henselae* comb. nov., and *Bartonella elizabethae* comb. nov., and to remove the family *Bartonellaceae* from the order *Rickettsiales*.** *Int J Syst Bacteriol* 1993, **43**:777-786.
47. Smit J, Hermodson M, Agabian N: ***Caulobacter crescentus* pilin. Purification, chemical characterization, and NH<sub>2</sub>-terminal amino acid sequence of a structural protein regulated during development.** *J Biol Chem* 1981, **256**:3092-3097.
48. Breitschwerdt EB, Hegarty BC, Hancock SI: **Sequential evaluation of dogs naturally infected with *Ehrlichia canis*, *Ehrlichia chaffeensis*, *Ehrlichia equi*, *Ehrlichia ewingii*, or *Bartonella vinsonii*.** *J Clin Microbiol* 1998, **36**:2645-2651.
49. Yurkov V, Stackebrandt E, Holmes A, Fuerst JA, Hugenholtz P, Golecki J, Gad'on N, Gorlenko VM, Kompantseva EI, Drews G: **Phylogenetic positions of novel aerobic, bacteriochlorophyll a-containing bacteria and description of *Roseococcus thiosulfatophilus* gen. nov., sp. nov., *Erythromicrobium ramosum* gen. nov., sp. nov., and *Erythrobacter litoralis* sp. nov.** *Int J Syst Bacteriol* 1994, **44**:427-434.
50. Tanaka M, Nakata Y, Mori T, Okamura Y, Miyasaka H, Takeyama H, Matsunaga T: **Development of a cell surface display system in a magnetotactic bacterium, "*Magnetospirillum magneticum*" AMB-1.** *Appl Environ Microbiol* 2008, **74**:3342-3348.
51. Bent SJ, Gucker CL, Oda Y, Forney LJ: **Spatial distribution of *Rhodopseudomonas palustris* ecotypes on a local scale.** *Appl Environ Microbiol* 2003, **69**:5192-5197.
52. Kelly PJ, Raoult D, Mason PR: **Isolation of spotted fever group rickettsias from triturated ticks using a modification of the centrifugation-shell vial technique.** *Trans R Soc Trop Med Hyg* 1991, **85**:397-398.
53. Johnson JW, Pedersen CE, Jr.: **Plaque formation by strains of spotted fever rickettsiae in monolayer cultures of various cell types.** *J Clin Microbiol* 1978, **7**:389-391.
54. Hjelm M, Riaza A, Formoso F, Melchiorson J, Gram L: **Seasonal incidence of autochthonous antagonistic *Roseobacter* spp. and *Vibrionaceae* strains in a turbot larva (*Scophthalmus maximus*) rearing system.** *Appl Environ Microbiol* 2004, **70**:7288-7294.

55. Gonzalez JM, Covert JS, Whitman WB, Henriksen JR, Mayer F, Scharf B, Schmitt R, Buchan A, Fuhrman JA, Kiene RP et al.: **Silicibacter pomeroyi sp. nov. and Roseovarius nubinhibens sp. nov., dimethylsulfoniopropionate-demethylating bacteria from marine environments.** *Int J Syst Evol Microbiol* 2003, **53**:1261-1269.
56. Fenollar F, La SB, Inokuma H, Dumler JS, Taylor MJ, Raoult D: **Culture and phenotypic characterization of a Wolbachia pipientis isolate.** *J Clin Microbiol* 2003, **41**:5434-5441.
57. Goodnow RA: **Biology of Bordetella bronchiseptica.** *Microbiol Rev* 1980, **44**:722-738.
58. Ulrich MP, Norwood DA, Christensen DR, Ulrich RL: **Using real-time PCR to specifically detect Burkholderia mallei.** *J Med Microbiol* 2006, **55**:551-559.
59. Brett PJ, Deshazer D, Woods DE: **Burkholderia thailandensis sp. nov., a Burkholderia pseudomallei-like species.** *Int J Syst Bacteriol* 1998, **48 Pt 1**:317-320.
60. Urakami T, Komagata K: **Emendation of mathylobacillus Yordy and weaver 1977, a genus for methanol-utilizing bacteria.** *Int J Syst Bacteriol* 1986, **36**:502-511.
61. Hommes NG, Sayavedra-Soto LA, Arp DJ: **Mutagenesis of hydroxylamine oxidoreductase in Nitrosomonas europaea by transformation and recombination.** *J Bacteriol* 1996, **178**:3710-3714.
62. Brandt KK, Hesselsoe M, Roslev P, Henriksen K, Sorensen J: **Toxic effects of linear alkylbenzene sulfonate on metabolic activity, growth rate, and microcolony formation of Nitrosomonas and Nitrospira strains.** *Appl Environ Microbiol* 2001, **67**:2489-2498.
63. Handrick R, Reinhardt S, Jendrossek D: **Mobilization of poly(3-hydroxybutyrate) in Ralstonia eutropha.** *J Bacteriol* 2000, **182**:5916-5918.
64. Finneran KT, Johnsen CV, Lovley DR: **Rhodoferax ferrireducens sp. nov., a psychrotolerant, facultatively anaerobic bacterium that oxidizes acetate with the reduction of Fe(III).** *Int J Syst Evol Microbiol* 2003, **53**:669-673.
65. Claus G, Kutzner HJ: **Autotrophic denitrificans by thiobacillus denitrificans in a packed bed reactor.** *Appl Microbiol Biotechnol* 1985, **22**:289-296.
66. Sanford RA, Cole JR, Tiedje JM: **Characterization and description of Anaeromyxobacter dehalogenans gen. nov., sp. nov., an aryl-halo-respiring facultative anaerobic myxobacterium.** *Appl Environ Microbiol* 2002, **68**:893-900.
67. Beck S, Schwudke D, Strauch E, Appel B, Linscheid M: **Bdellovibrio bacteriovorus strains produce a novel major outer membrane protein during predacious growth in the periplasm of prey bacteria.** *J Bacteriol* 2004, **186**:2766-2773.
68. Knoblauch C, Sahm K, Jorgensen BB: **Psychrophilic sulfate-reducing bacteria isolated from permanently cold arctic marine sediments: description of Desulfofrigus oceanense gen. nov., sp. nov., Desulfofrigus fragile sp. nov., Desulfotalea gelida gen. nov., sp. nov., Desulfotalea psychrophila gen. nov., sp. nov. and Desulfotalea arctica sp. nov.** *Int J Syst Bacteriol* 1999, **49 Pt 4**:1631-1643.

69. McDougall R, Robson J, Paterson D, Tee W: **Bacteremia caused by a recently described novel *Desulfovibrio* species.** *J Clin Microbiol* 1997, **35**:1805-1808.
70. Lovley DR, Giovannoni SJ, White DC, Champine JE, Phillips EJ, Gorby YA, Goodwin S: ***Geobacter metallireducens* gen. nov. sp. nov., a microorganism capable of coupling the complete oxidation of organic compounds to the reduction of iron and other metals.** *Arch Microbiol* 1993, **159**:336-344.
71. Ortiz-Bernad I, Anderson RT, Vrionis HA, Lovley DR: **Vanadium respiration by *Geobacter metallireducens*: novel strategy for in situ removal of vanadium from groundwater.** *Appl Environ Microbiol* 2004, **70**:3091-3095.
72. Vinogradov E, Korenevsky A, Lovley DR, Beveridge TJ: **The structure of the core region of the lipopolysaccharide from *Geobacter sulfurreducens*.** *Carbohydr Res* 2004, **339**:2901-2904.
73. Burchard RP: **Growth of surface colonies of the gliding bacterium *Myxococcus xanthus*.** *Arch Microbiol* 1974, **96**:247-254.
74. McInerney MJ, Rohlin L, Mouttaki H, Kim U, Krupp RS, Rios-Hernandez L, Sieber J, Struchtemeyer CG, Bhattacharyya A, Campbell JW et al.: **The genome of *Syntrophus aciditrophicus*: life at the thermodynamic limit of microbial growth.** *Proc Natl Acad Sci U S A* 2007, **104**:7600-7605.
75. Jannasch HW, Wirsén CO, Nelson DC, Robertson LA: ***Thiomicrospira crunogena* sp. nov., a colorless, sulfur-oxidizing bacterium from a deep-sea hydrothermal vent.** *Int J Syst Bacteriol* 1985, **35**:422-424.
76. Barbe V, Vallenet D, Fonknechten N, Kreimeyer A, Oztas S, Labarre L, Cruveiller S, Robert C, Duprat S, Wincker P et al.: **Unique features revealed by the genome sequence of *Acinetobacter* sp. ADP1, a versatile and naturally transformation competent bacterium.** *Nucleic Acids Res* 2004, **32**:5766-5779.
77. Martínez-Murcia A, Monera A, Alperi A, Figueras MJ, Saavedra MJ: **Phylogenetic evidence suggests that strains of *Aeromonas hydrophila* subsp. *dhakensis* belong to the species *Aeromonas aquariorum* sp. nov.** *Curr Microbiol* 2009, **58**:76-80.
78. Yakimov MM, Golyshin PN, Lang S, Moore ER, Abraham WR, Lunsdorf H, Timmis KN: ***Alcanivorax borkumensis* gen. nov., sp. nov., a new, hydrocarbon-degrading and surfactant-producing marine bacterium.** *Int J Syst Bacteriol* 1998, **48 Pt 2**:339-348.
79. Schneiker S, Martins dS, V, Bartels D, Bekel T, Brecht M, Buhrmester J, Chernikova TN, Denaro R, Ferrer M, Gertler C et al.: **Genome sequence of the ubiquitous hydrocarbon-degrading marine bacterium *Alcanivorax borkumensis*.** *Nat Biotechnol* 2006, **24**:997-1004.
80. Wu D, Daugherty SC, Van Aken SE, Pai GH, Watkins KL, Khouri H, Tallon LJ, Zaborsky JM, Dunbar HE, Tran PL et al.: **Metabolic complementarity and genomics of the dual bacterial symbiosis of sharpshooters.** *PLoS Biol* 2006, **4**:e188.
81. Musso D, Raoult D: ***Coxiella burnetii* blood cultures from acute and chronic Q-fever patients.** *J Clin Microbiol* 1995, **33**:3129-3132.
82. Penn RL: ***Francisella tularensis* (tularemia).** In *Principles and practices of infectious diseases*. 4th edition. Edited by Mandell GL, Bennett JE, Dolin R. New York: Churchill Livingstone; 1995:2061-2068.

83. Donachie SP, Hou S, Gregory TS, Malahoff A, Alam M: **Idiomarina loihiensis sp. nov., a halophilic gamma-Proteobacterium from the Lo'ihī submarine volcano, Hawai'i.** *Int J Syst Evol Microbiol* 2003, **53**:1873-1879.
84. Zahn JA, Duncan C, DiSpirito AA: **Oxidation of hydroxylamine by cytochrome P-460 of the obligate methylophilic Methylococcus capsulatus Bath.** *J Bacteriol* 1994, **176**:5879-5887.
85. Ekborg NA, Taylor LE, Longmire AG, Henrissat B, Weiner RM, Hutcheson SW: **Genomic and proteomic analyses of the agarolytic system expressed by *Saccharophagus degradans* 2-40.** *Appl Environ Microbiol* 2006, **72**:3396-3405.
86. Wernegreen JJ, Degnan PH, Lazarus AB, Palacios C, Bordenstein SR: **Genome evolution in an insect cell: distinct features of an ant-bacterial partnership.** *Biol Bull* 2003, **204**:221-231.
87. Norris SJ, Howell JK, Garza SA, Ferdows MS, Barbour AG: **High- and low-infectivity phenotypes of clonal populations of in vitro-cultured *Borrelia burgdorferi*.** *Infect Immun* 1995, **63**:2206-2212.
88. Guner ES, Hashimoto N, Kadosaka T, Imai Y, Masuzawa T: **A novel, fast-growing *Borrelia* sp. isolated from the hard tick *Hyalomma aegyptium* in Turkey.** *Microbiology* 2003, **149**:2539-2544.
89. Wuthiekanun V, Chierakul W, Limmathurotsakul D, Smythe LD, Symonds ML, Dohnt MF, Slack AT, Limpai boon R, Suputtamongkol Y, White NJ et al.: **Optimization of culture of *Leptospira* from humans with leptospirosis.** *J Clin Microbiol* 2007, **45**:1363-1365.
90. Vesey PM, Kuramitsu HK: **Genetic analysis of *Treponema denticola* ATCC 35405 biofilm formation.** *Microbiology* 2004, **150**:2401-2407.
91. Lafond RE, Lukehart SA: **Biological basis for syphilis.** *Clin Microbiol Rev* 2006, **19**:29-49.
92. Huber R, Langworthy TA, König H, Thomm M, Woese CR, Sleytr UB, Stetter KO: ***Thermotoga maritima* sp. nov. represents a new genus of unique extremely thermophilic eubacteria growing up to 90°C.** *Arch Microbiol* 1986, **144**:324-333.
