# Supplementary figures and images for: Massive comparative genomic analysis reveals convergent evolution of specialized bacteria
Source: Springer Nature journal article supplement (doi:10.1186/1745-6150-4-13), 2009-04-10

Probability of observing at least 100 COGs lost in common

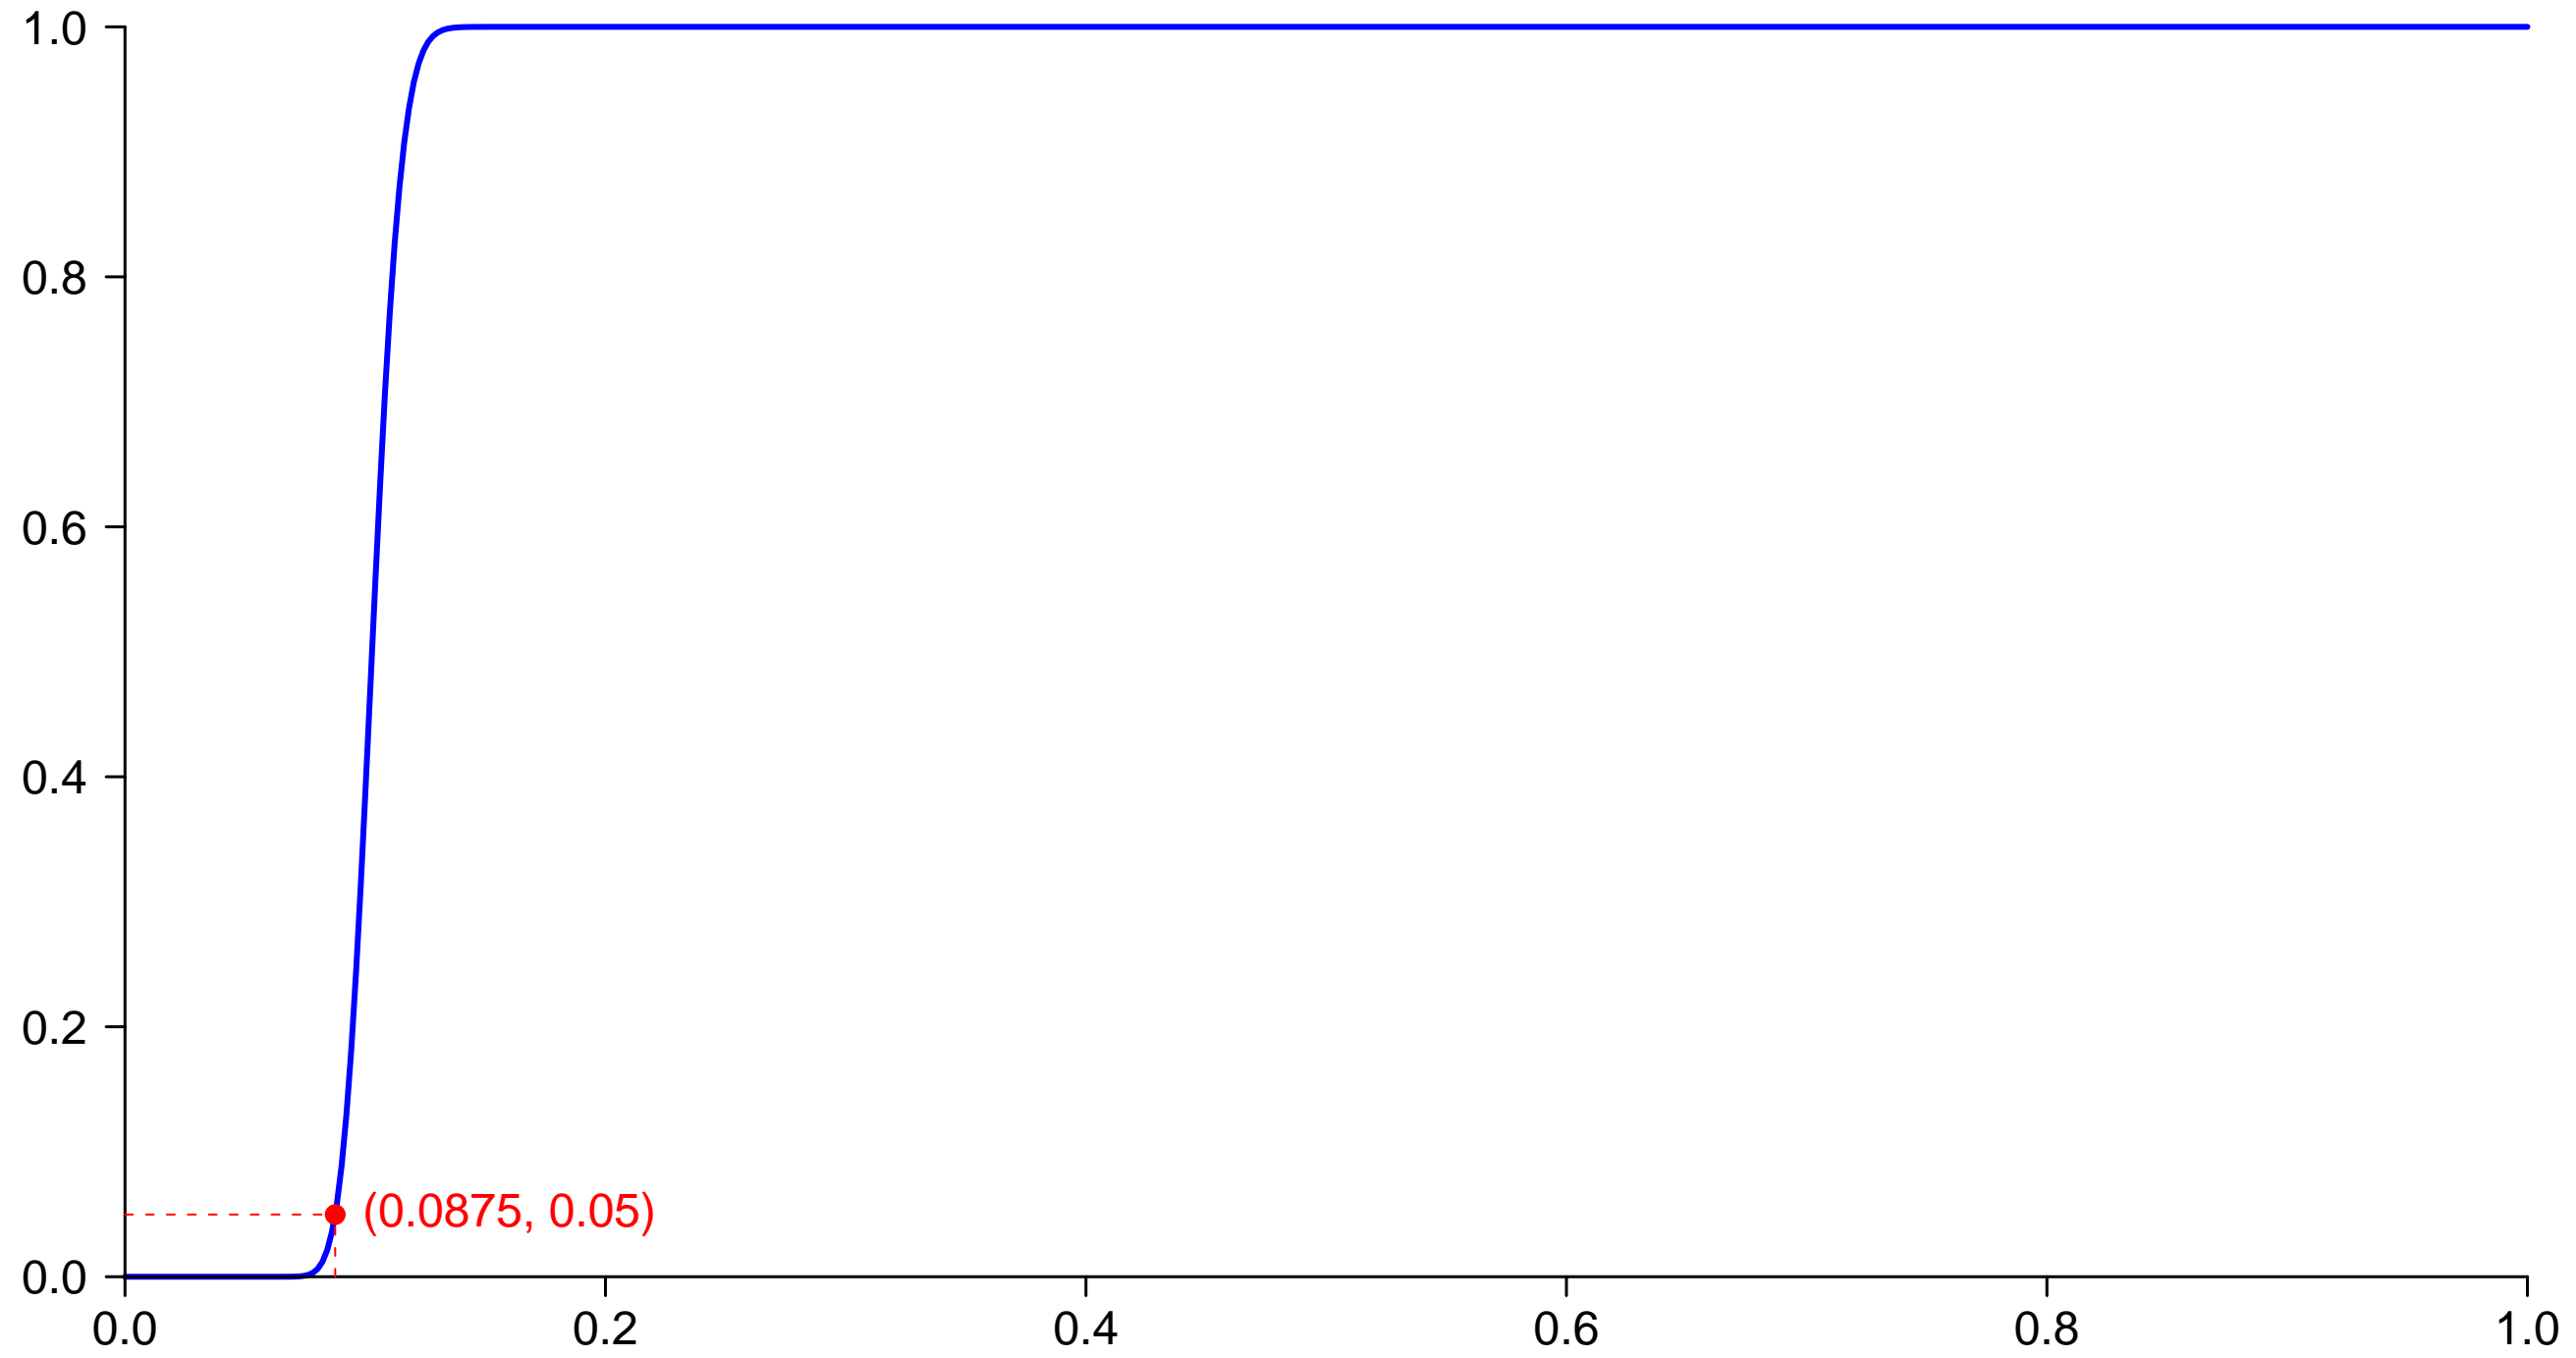

Theoretical probability  $p_0$

Supplement: Additional file 11 [file 1745-6150-4-13-s11.pdf]
